# Supplementary material for: Solvent modulation of the morphology of homochiral gadolinium coordination polymers and its impact on circularly polarized luminescence
Source: Royal Society of Chemistry journal article supplement (doi:10.1039/d3dt03735e), 2024-01-01
Supplement: d3dt03735e1.pdf [file d3dt03735e1.pdf]

## Supporting Information

### **Solvent modulation of the morphology of homochiral gadolinium coordination polymers and its impact on circularly polarized luminescence**

Ting Hou,<sup>a</sup> Chen-Chen Zhao,<sup>b</sup> Song-Song Bao,<sup>a</sup> Zhi-Min Zhai,<sup>a</sup> and Li-Min Zheng<sup>a,\*</sup>

---

[a] T. Hou, Prof. Dr. S.-S. Bao, Z.-M. Zhai, and Prof. Dr. L.-M. Zheng

State Key Laboratory of Coordination Chemistry, School of Chemistry and Chemical Engineering, Nanjing University, Nanjing, 210023, P. R. China  
E-mail: lmzheng@nju.edu.cn

[b] C.-C. Zhao

Theoretical and Computational Chemistry Institute, School of Chemistry and Chemical Engineering, Nanjing University, Nanjing 210023, P. R. China.

\*Correspondence: lmzheng@nju.edu.cn

## Content

|                                                                                                                                                                       |    |
|-----------------------------------------------------------------------------------------------------------------------------------------------------------------------|----|
| I. Experimental section .....                                                                                                                                         | 3  |
| II. Synthesis and characterization of chiral spiral bundles, crystals and spindle-shaped particles of $\text{Gd}(\text{NO}_3)_3/R,S\text{-AnempH}_2$ assemblies ..... | 6  |
| III. The structure of $R\text{-2}$ .....                                                                                                                              | 22 |
| IV. The influence of reaction conditions on the spiral bundles .....                                                                                                  | 28 |
| V. The influence of morphology on optical properties .....                                                                                                            | 53 |

## I. Experimental section

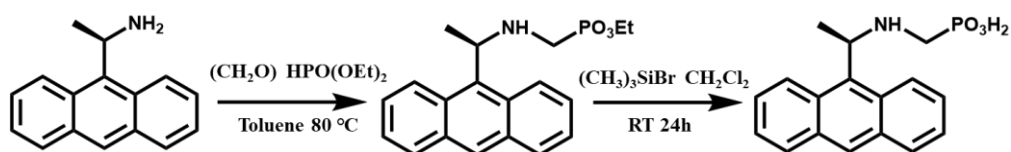

Scheme S1. Synthetic routes of *R*-AnempEt<sub>2</sub> and *R*-AnempH<sub>2</sub> ligands.

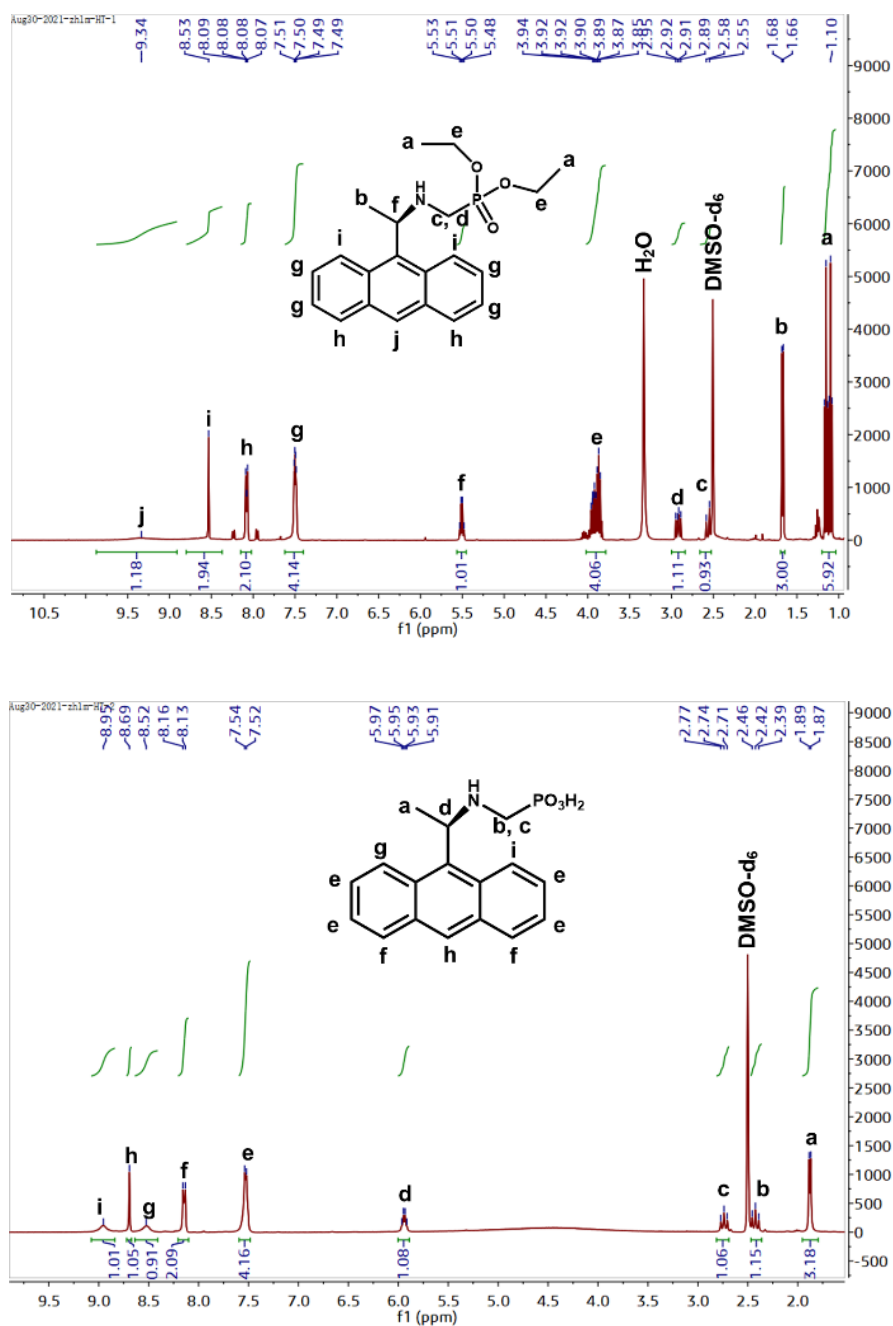

Figure S1. <sup>1</sup>H NMR spectra of *R*-AnempEt<sub>2</sub> and *R*-AnempH<sub>2</sub> ligand (400 MHz, DMSO-d<sub>6</sub>).

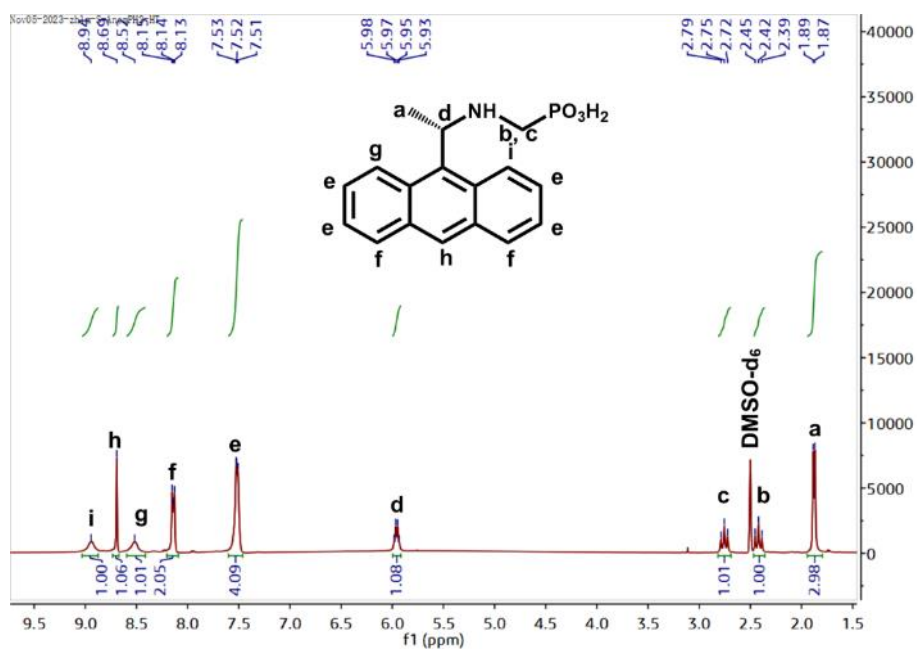

Figure S2.  $^1\text{H}$  NMR spectra of S-AnempH<sub>2</sub> ligand (400 MHz, DMSO-d<sub>6</sub>).

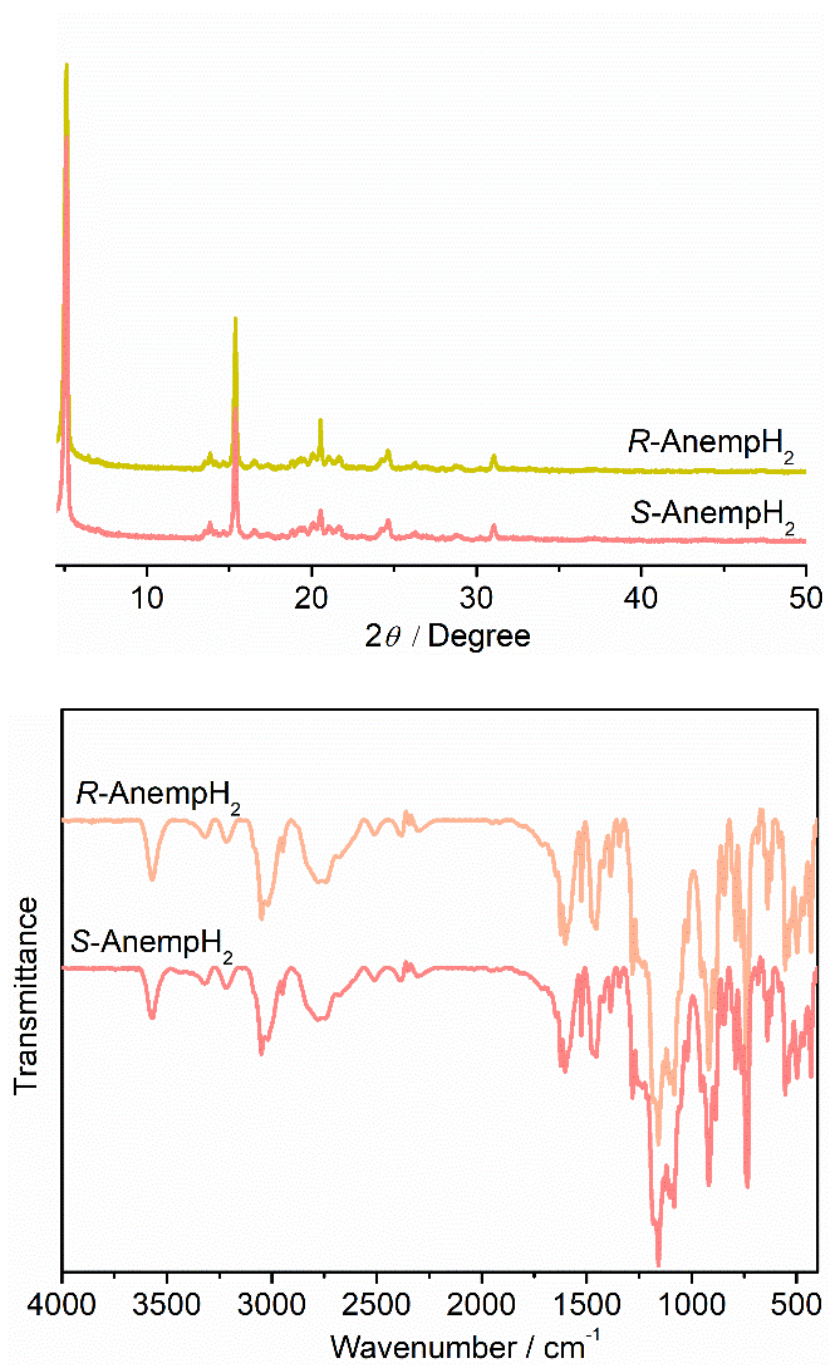

Figure S3. (top) PXRD and (bottom) IR spectra of  $R\text{-AnempH}_2$  and  $S\text{-AnempH}_2$  ligands.

## II. Synthesis and characterization of chiral spiral bundles, crystals and spindle-shaped particles of $\text{Gd}(\text{NO}_3)_3/\text{R-,S-AnempH}_2$ assemblies

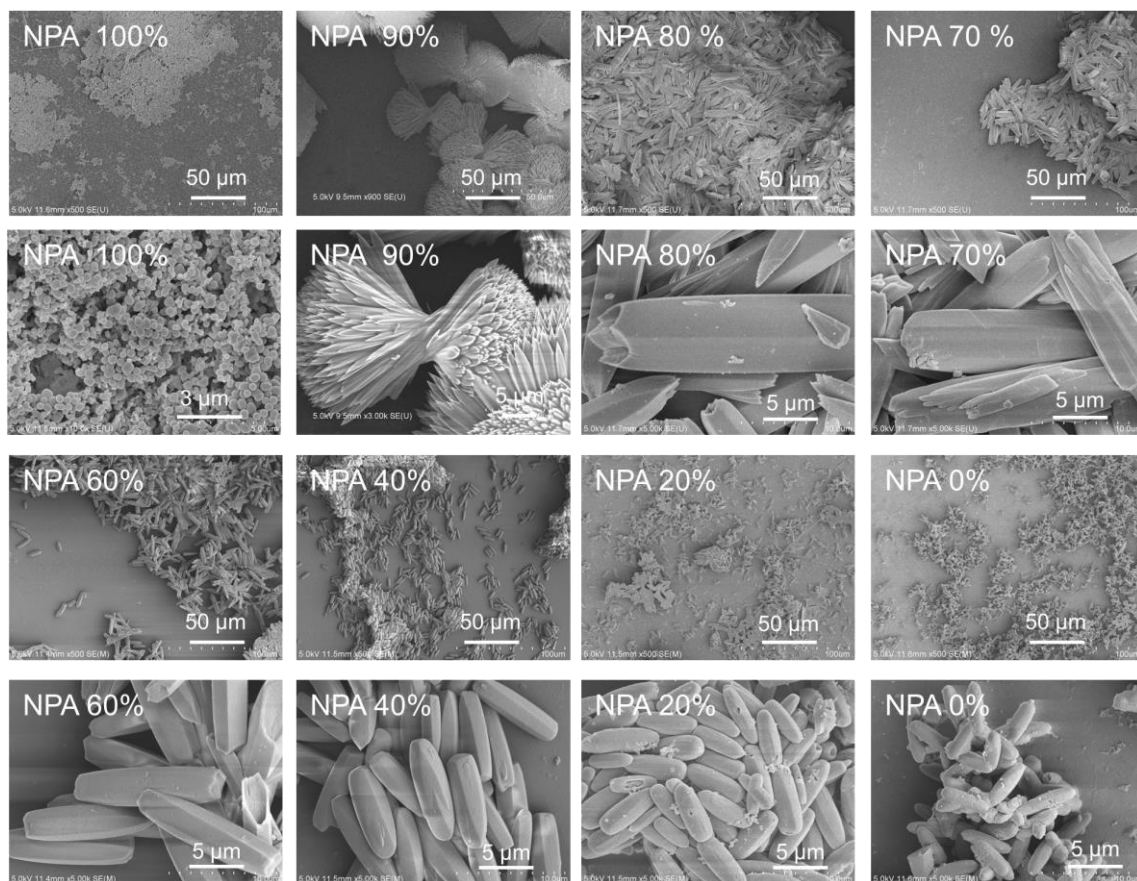

Figure S4. SEM images showing the morphology of reaction products of  $\text{Gd}^{3+}/\text{R-AnempH}_2$  (1:3) obtained in different volume ratio of NPA/DMF (total volume 5 mL) and 0.5 mL  $\text{H}_2\text{O}$  at 100°C.

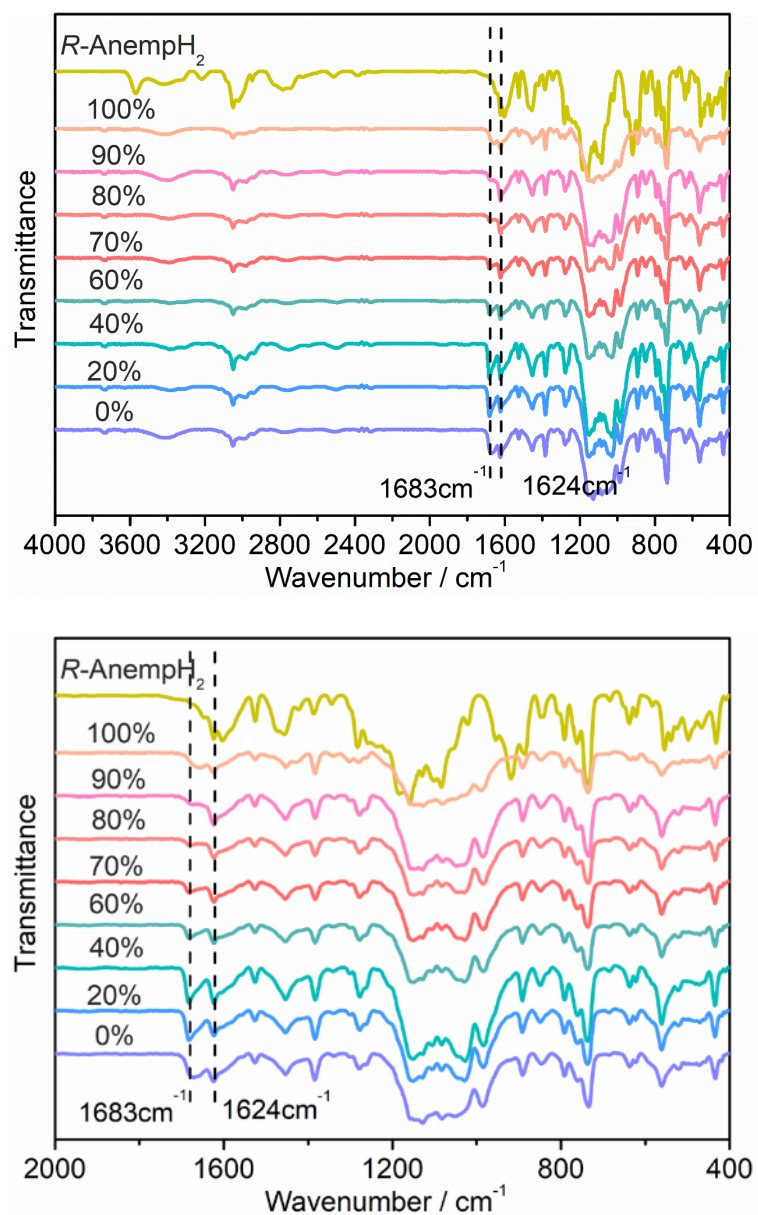

Figure S5. IR spectra of the reaction products of  $\text{Gd}^{3+}/\text{R-AnempH}_2$  (1:3) obtained in different volume ratio of NPA/DMF (total volume 5 mL) and 0.5 mL  $\text{H}_2\text{O}$  at  $100^\circ\text{C}$  (up: 4000-400  $\text{cm}^{-1}$ , bottom: 2000-400  $\text{cm}^{-1}$ ).

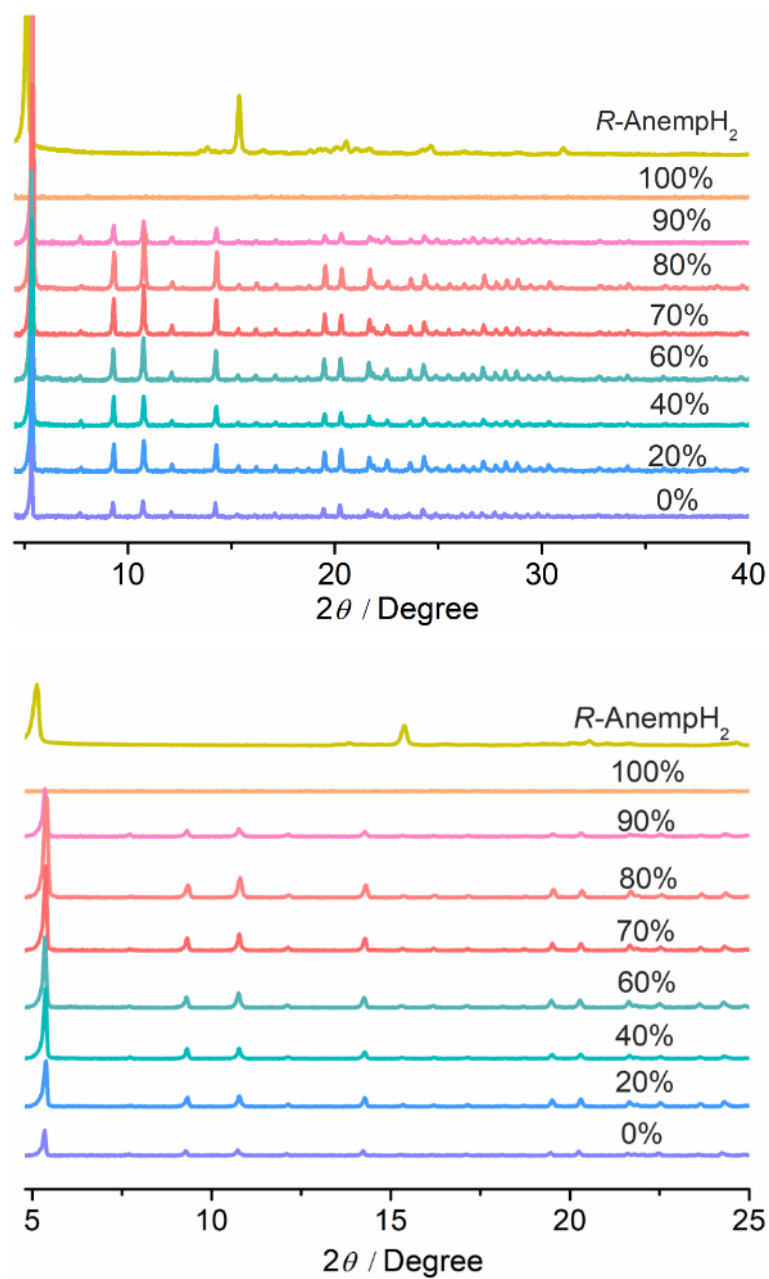

Figure S6. PXRD patterns of the reaction products of  $\text{Gd}^{3+}/R\text{-AnempH}_2$  (1:3) obtained in different volume ratio of NPA/DMF (total volume 5 mL) and 0.5 mL  $\text{H}_2\text{O}$  at  $100^\circ\text{C}$  (up:  $2\theta$  4.5-40°, bottom:  $2\theta$  4. 5-25°).



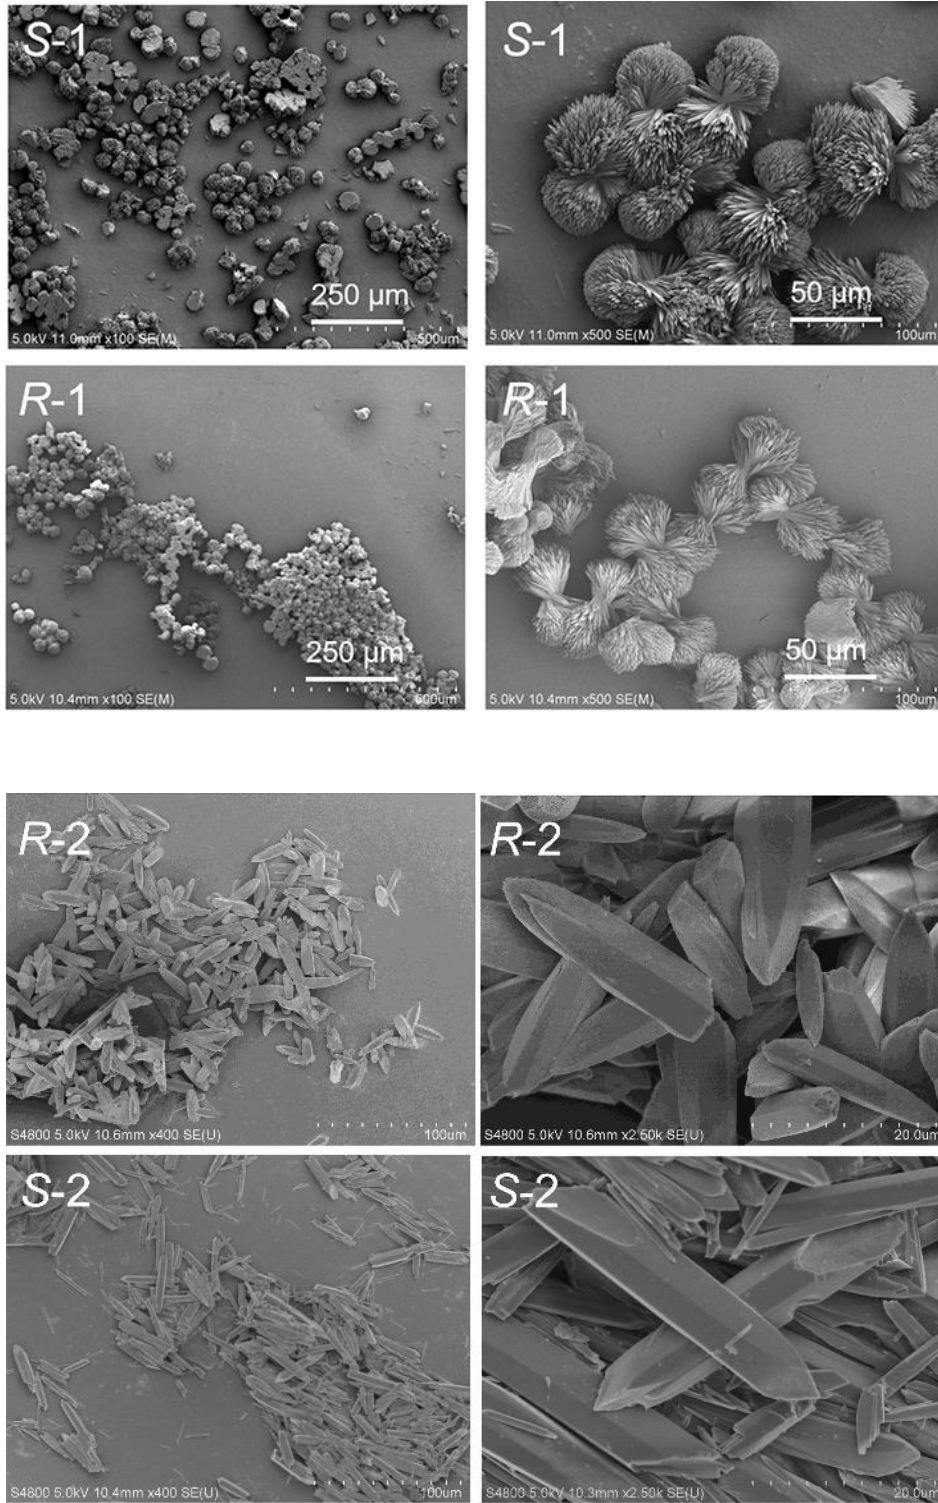

Figure S7. SEM images of R/S-1 and R/S-2.

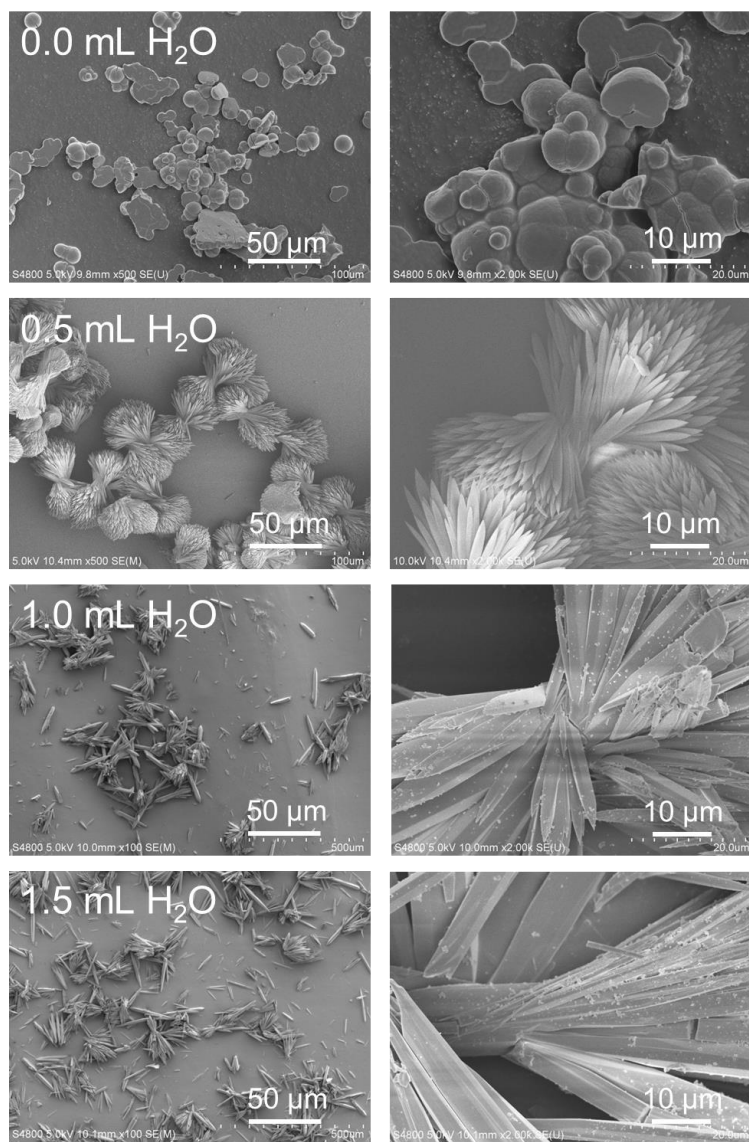

Figure S8. SEM images showing the morphology of the reaction products of  $Gd^{3+}/R\text{-AnempH}_2$  (1:3) obtained in 90 vol % NPA/DMF (total volume 5 mL) and different volume of deionized water (0.0, 0.5, 1.0 1.5 mL) at 100°C.

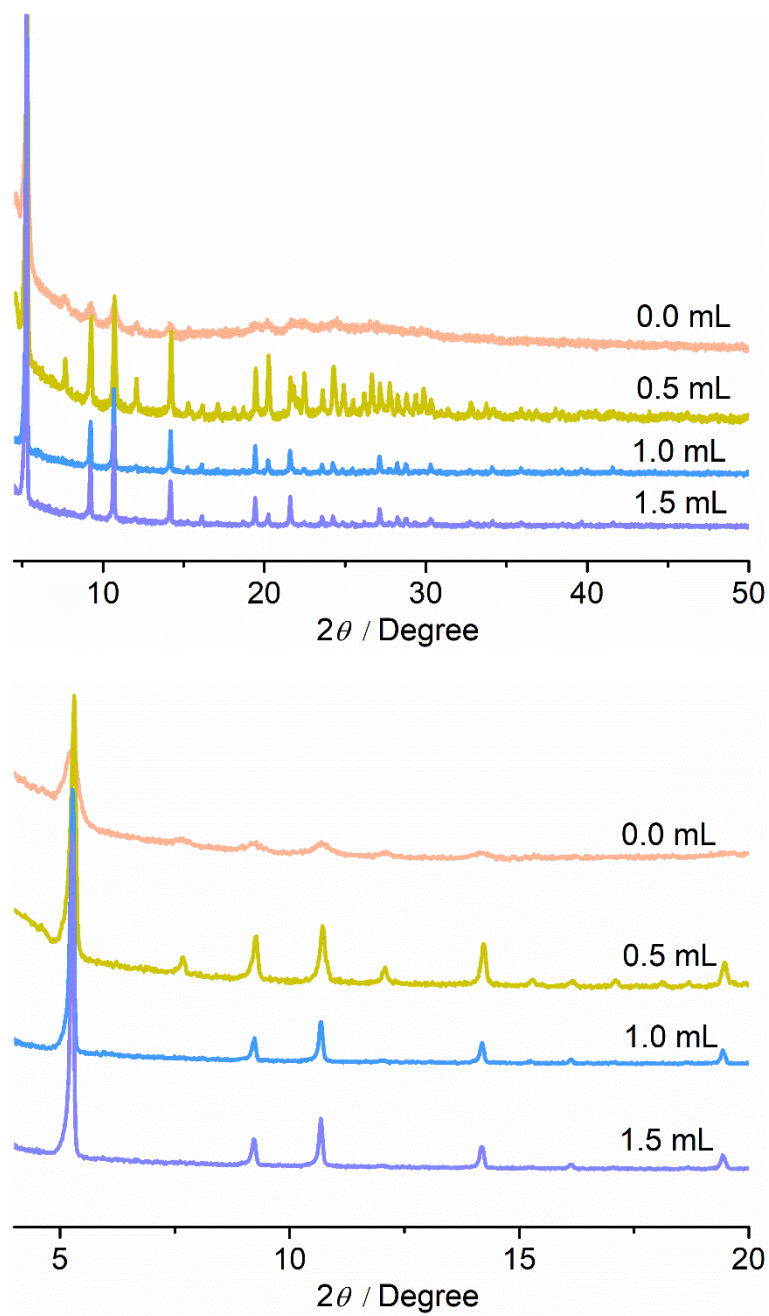

Figure S9. PXRD patterns of the reaction products of  $\text{Gd}^{3+}/\text{R-AnempH}_2$  (1:3) obtained in 90 vol % NPA/DMF (total volume 5 mL) and different volume of deionized water (0.0, 0.5, 1.0 1.5 mL) at  $100^\circ\text{C}$  (up:  $2\theta$  4-40°, bottom:  $2\theta$  4-20°).

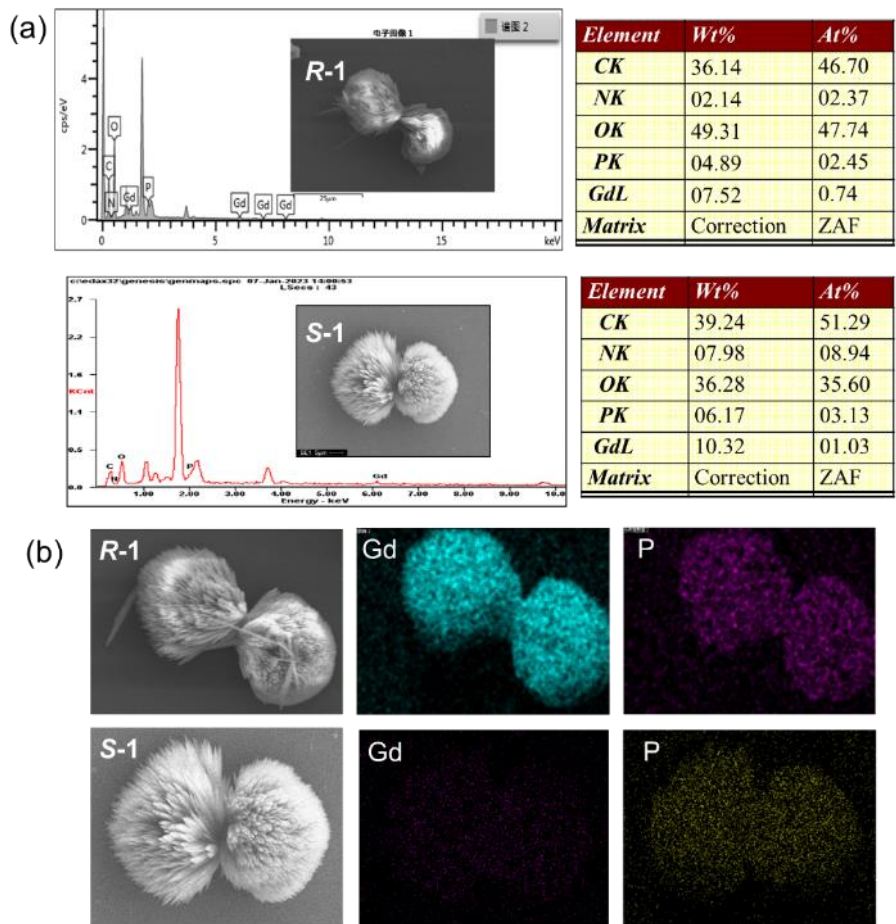

Figure S10. (a) EDS results and (b) mapping images of *R-1* and *S-1*.

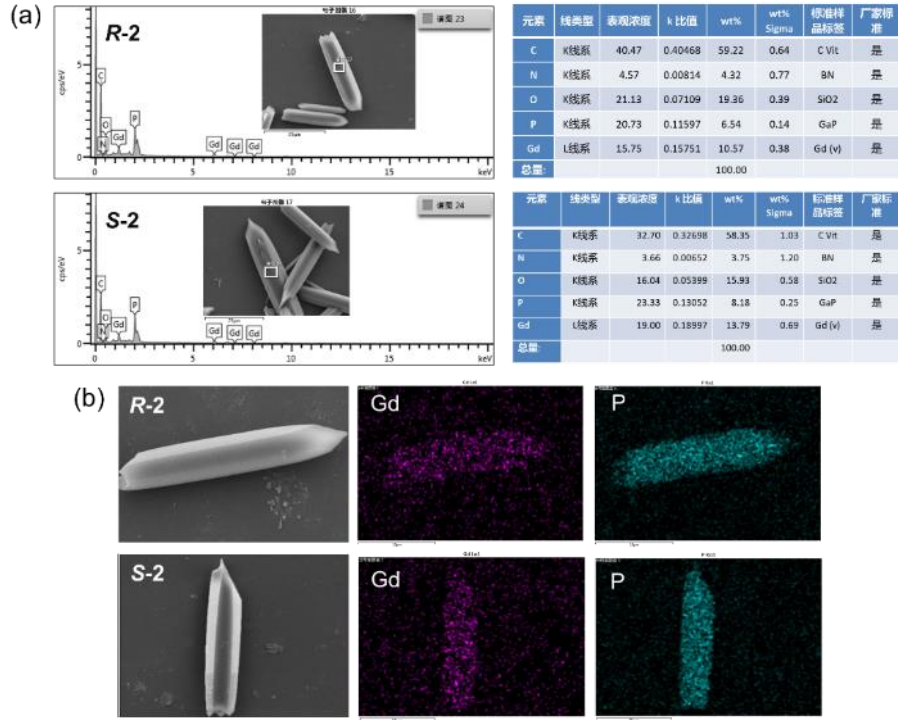

Figure S11. (a) EDS result and (b) mapping images of **R-2** and **S-2**.

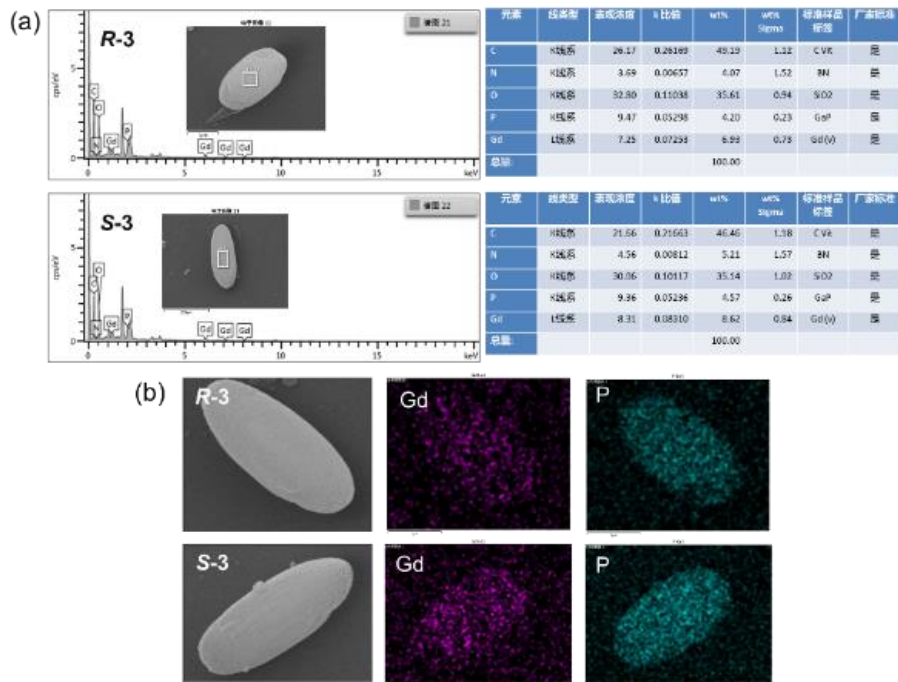

Figure S12. (a) EDS result and (b) mapping images of **R-3**, **S-3**.

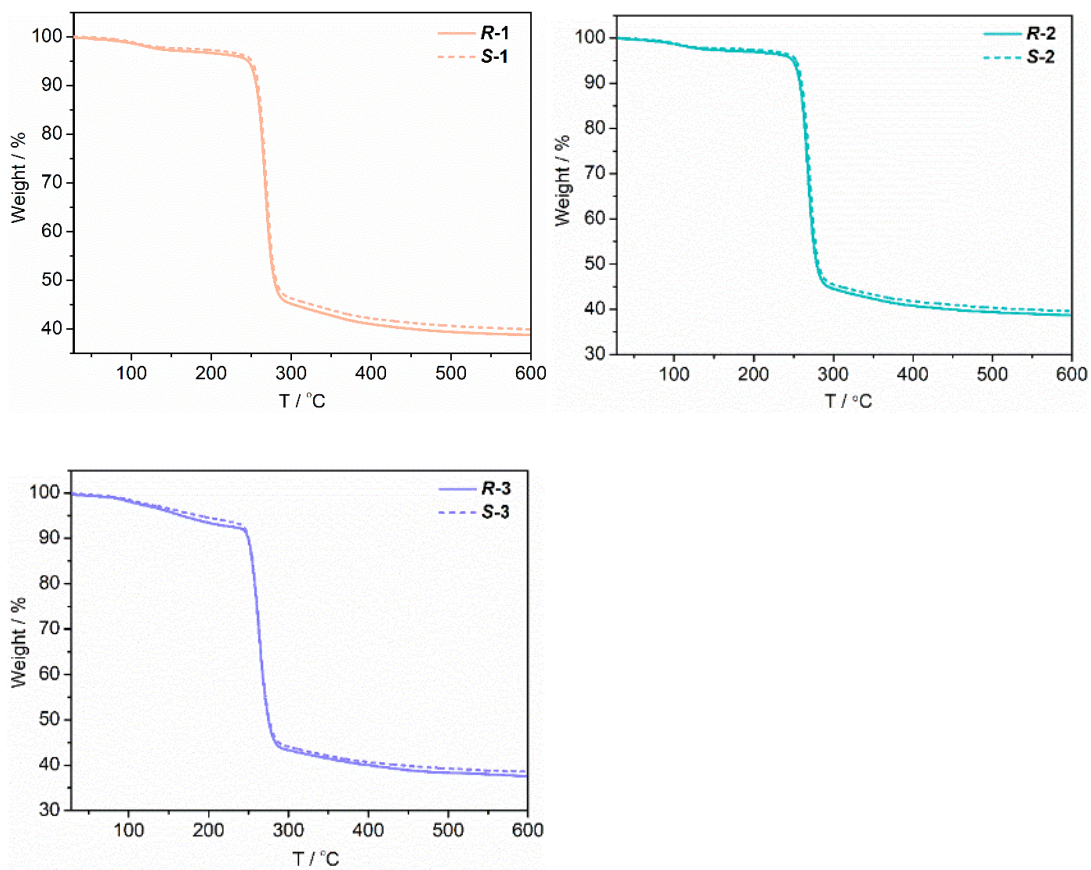

Figure S13. TG curves of **R-1**, **S-1**, **R-2**, **S-2** and **R-3**, **S-3**. The weight losses are 3.3% (for **R-1**), 3.1% (for **S-1**), 3.0% (**R-2**) and 2.9% (for **S-2**) in the temperature 30-150°C, which agree well with the values expected for the removal of two lattice water molecules (calcd. 3.2%). For **R-3** and **S-3**, the weight losses are 7.4% and 6.7% in the temperature 30-220°C, which agree well with the values expected for the removal of three lattice water molecules and 0.5 DMF molecules (calcd. 7.2%).

Table S1. Element analysis of **R-1**, **S-1**, **R-2**, **S-2**, **R-3** and **S-3**.

|            | Chemical formula                                             | Experiment / %          | Calculation / %         |
|------------|--------------------------------------------------------------|-------------------------|-------------------------|
| <b>R-1</b> | Gd( <i>R</i> -AnempH) <sub>3</sub> ·2H <sub>2</sub> O        | C 53.69; H 4.99; N 3.77 | C 53.87; H 4.84; N 3.70 |
| <b>S-1</b> | Gd( <i>S</i> -AnempH) <sub>3</sub> ·2H <sub>2</sub> O        | C 53.94; H 4.91; N 3.72 | C 53.87; H 4.84; N 3.70 |
| <b>R-2</b> | Gd( <i>R</i> -AnempH) <sub>3</sub> ·2H <sub>2</sub> O        | C 53.71; H 5.11; N 3.80 | C 53.87; H 4.84; N 3.70 |
| <b>S-2</b> | Gd( <i>S</i> -AnempH) <sub>3</sub> ·2H <sub>2</sub> O        | C 53.95; H 5.04; N 3.77 | C 53.87; H 4.84; N 3.70 |
| <b>R-3</b> | Gd( <i>R</i> -AnempH) <sub>3</sub> ·3H <sub>2</sub> O·0.5DMF | C 52.63; H 4.89; N 4.47 | C 52.91; H 5.08; N 4.11 |
| <b>S-3</b> | Gd( <i>S</i> -AnempH) <sub>3</sub> ·3H <sub>2</sub> O·0.5DMF | C 52.70; H 5.18; N 4.40 | C 52.91; H 5.08; N 4.11 |

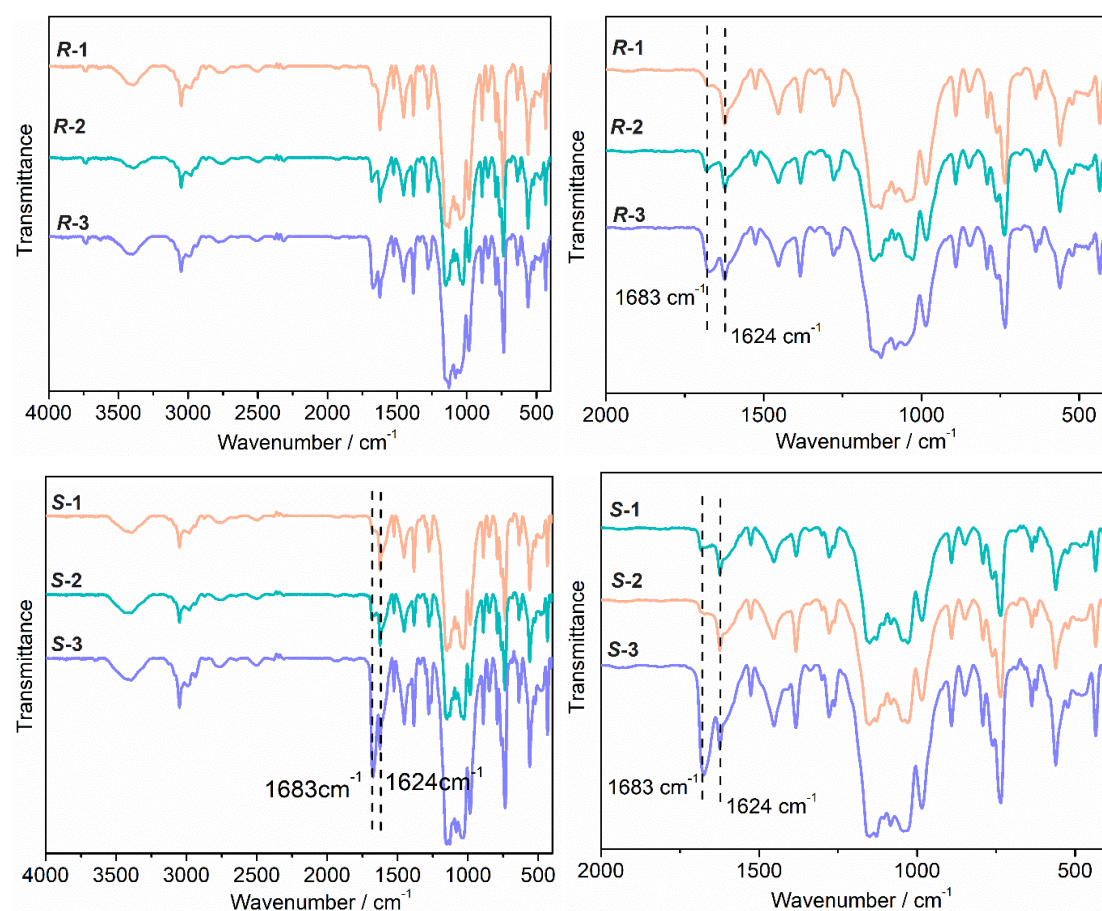

Figure S14. IR spectra of the *R*- and *S*-isomers of **1**, **2** and **3** (left: 4000-400 cm<sup>-1</sup>, right: 2000-400 cm<sup>-1</sup>).

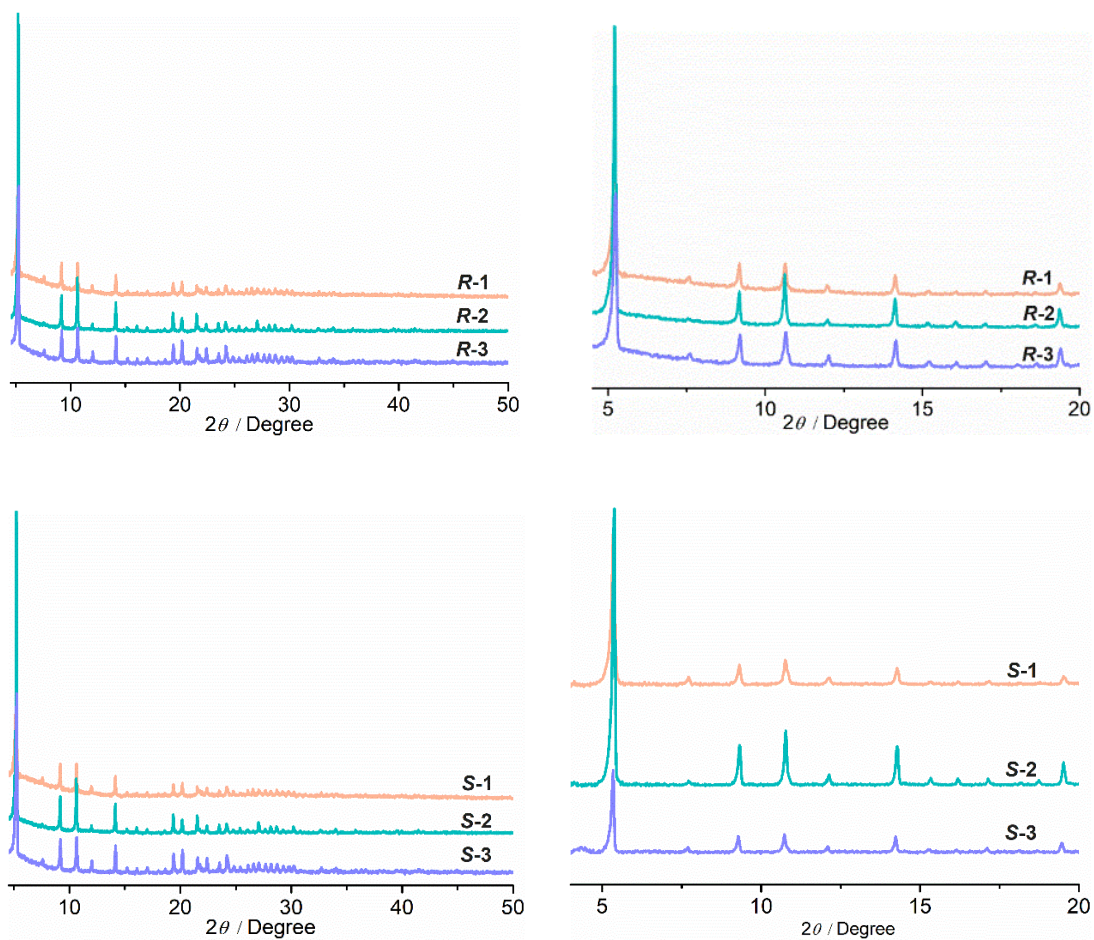

Figure S15. PXRD patterns of the *R*- and *S*-isomers of **1**, **2** and **3** (left:  $2\theta$  4-50°, right:  $2\theta$  4-20°).



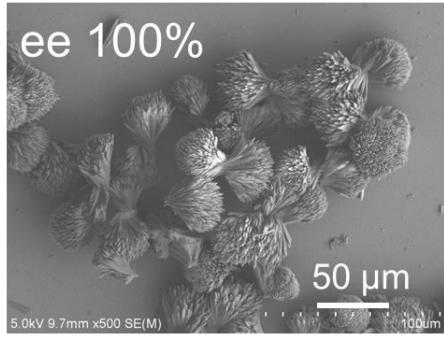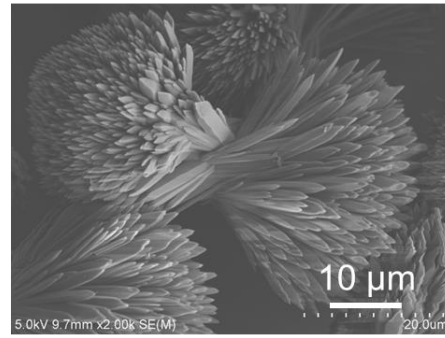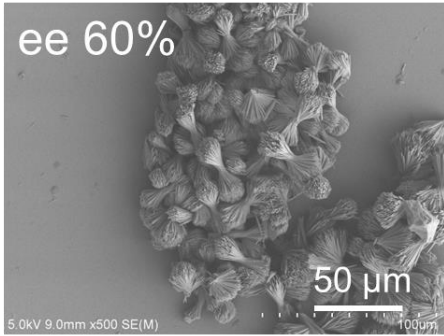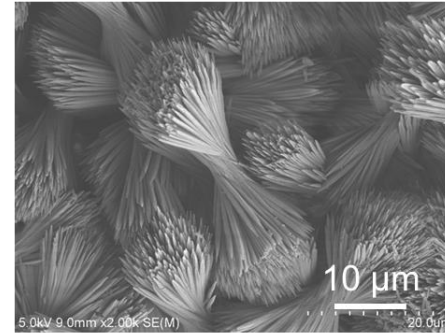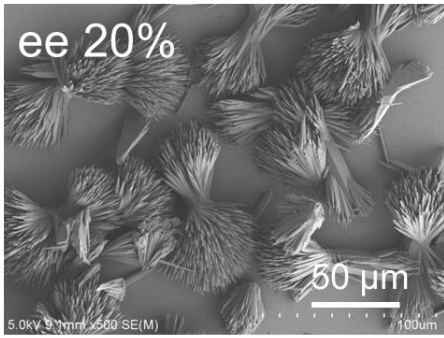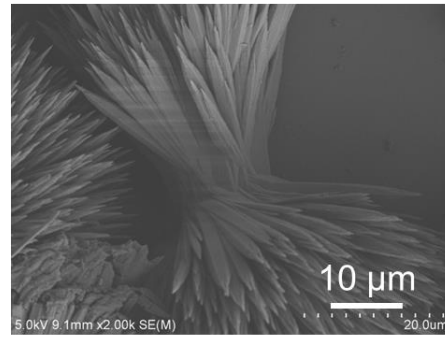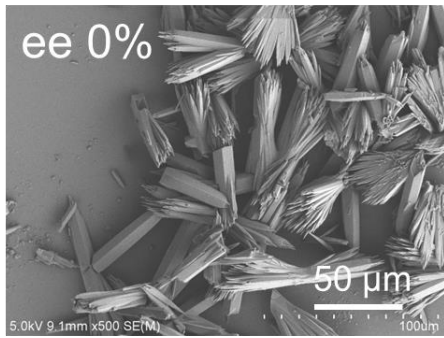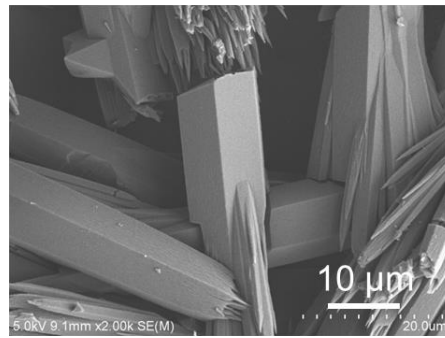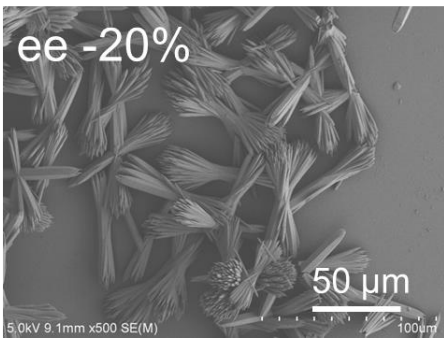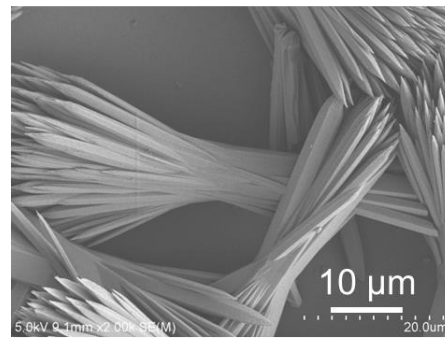

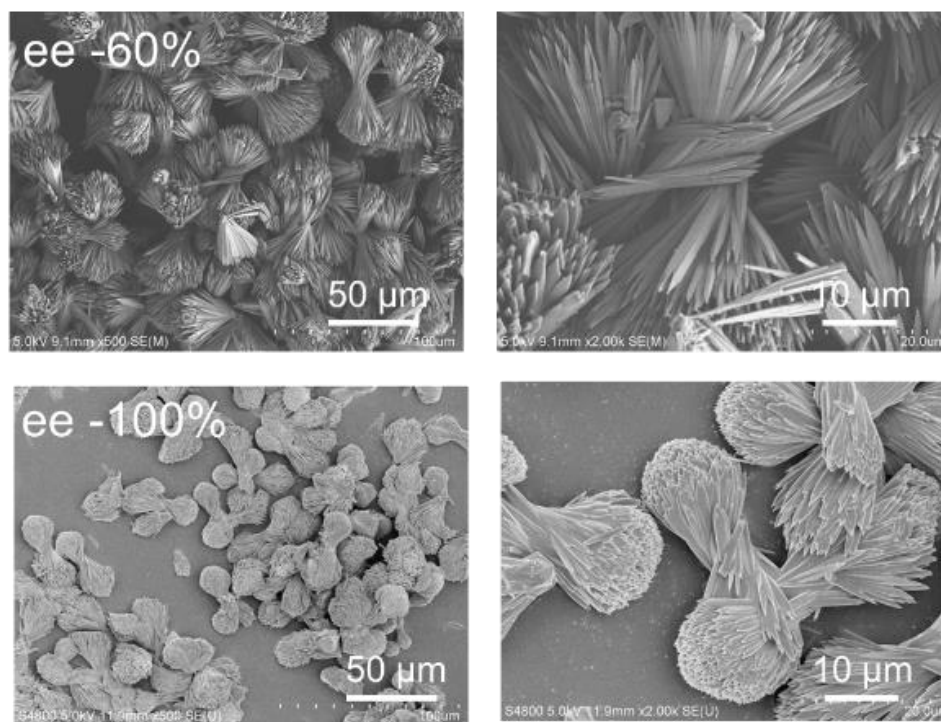

Figure S16. SEM images of the  $\text{Gd}(\text{NO}_3)_3/\text{R-,S-AnempH}_2$  assemblies obtained in 90 vol % NPA / DMF (total volume 5 mL) and 0.5 mL water with different ratio of the  $\text{R-AnempH}_2/\text{S-AnempH}_2$  enantiomers.

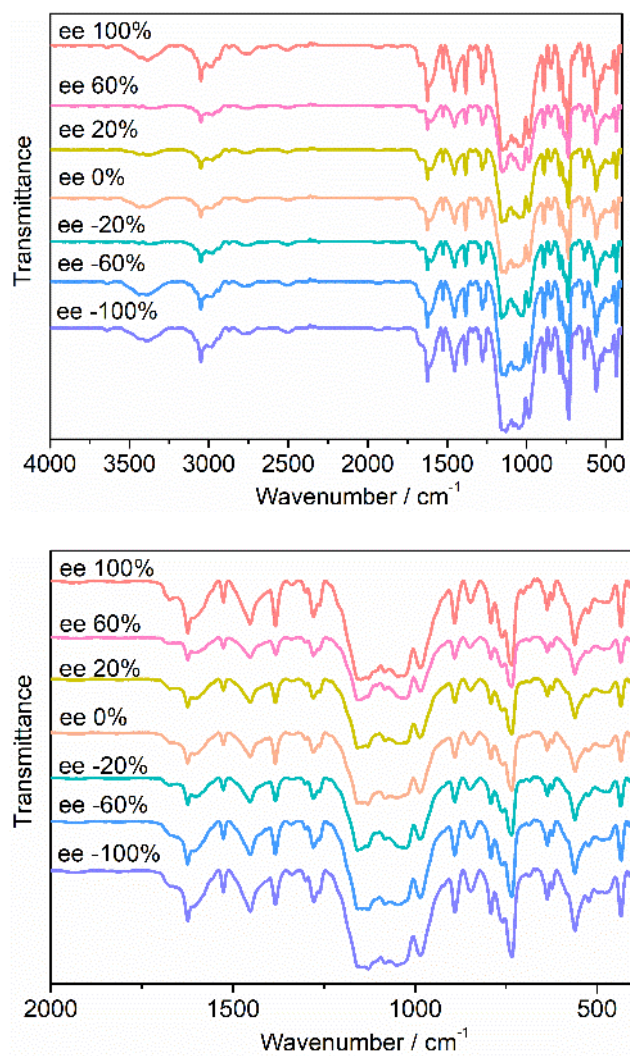

Figure S17. IR spectra of the  $\text{Gd}(\text{NO}_3)_3/\text{R-,S-AnempH}_2$  assemblies obtained in 90 vol % NPA / DMF (total volume 5 mL) and 0.5 mL water with different ratio of the *R*-AnempH<sub>2</sub>/*S*-AnempH<sub>2</sub> enantiomers.

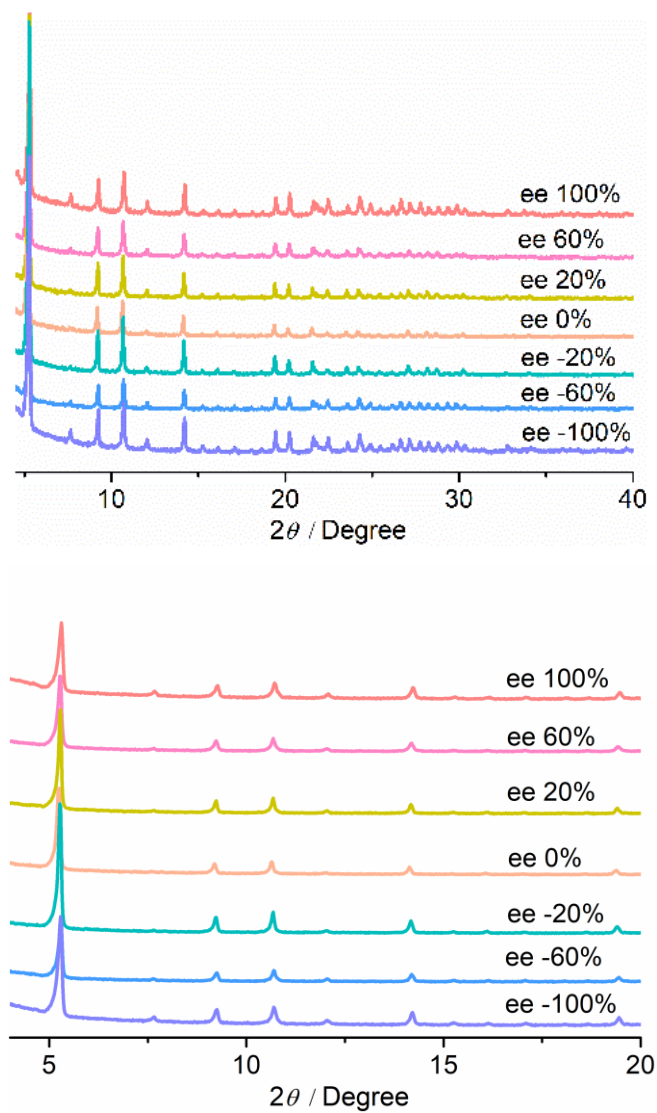

Figure S18. PXRD patterns of the  $\text{Gd}(\text{NO}_3)_3/\text{R},\text{S}\text{-AnempH}_2$  assemblies obtained in 90 vol % NPA / DMF (total volume 5 mL) and 0.5 mL water with different ratio of the *R*-AnempH<sub>2</sub>/*S*-AnempH<sub>2</sub> enantiomers.

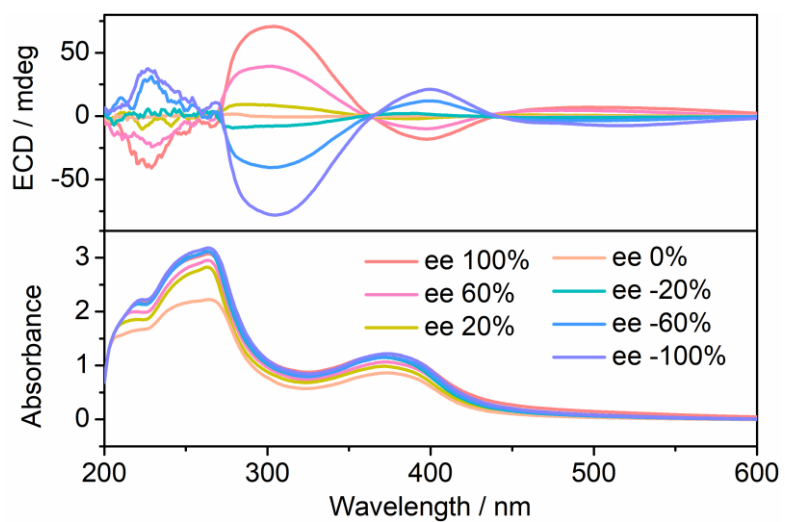

Figure S19. ECD spectra of the  $\text{Gd}(\text{NO}_3)_3/\text{R-,S-AnempH}_2$  assemblies obtained in 90 vol % NPA / DMF (total volume 5 mL) and 0.5 mL water with different ratio of the  $\text{R-AnempH}_2/\text{S-AnempH}_2$  enantiomers. The measurements were performed on a JASCO J-810 spectrophotometer.

### III. The structure of *R-2*

Table S2. Selected bond lengths [Å] for *R-2*.

| bond lengths | [Å]    | bond lengths | [Å]    |
|--------------|--------|--------------|--------|
| Gd1-O1       | 2.3863 | Gd2-O7D      | 2.3138 |
| Gd1-O3       | 2.5354 | Gd3-O7       | 2.4056 |
| Gd1-O4       | 2.5369 | Gd3-O10      | 2.2674 |
| Gd1-O1B      | 2.3863 | Gd3-O7B      | 2.4056 |
| Gd1-O3B      | 2.5354 | Gd3-O10B     | 2.2674 |
| Gd1-O4B      | 2.5369 | Gd3-O7D      | 2.4056 |
| Gd1-O1D      | 2.3863 | Gd3-O10D     | 2.2674 |
| Gd1-O3D      | 2.5354 | Gd4-O12      | 2.1922 |
| Gd1-O4D      | 2.5369 | Gd4-O3A      | 2.3206 |
| Gd2-O4       | 2.3018 | Gd4-O12B     | 2.1921 |
| Gd2-O7       | 2.3138 | Gd4-O3C      | 2.3206 |
| Gd2-O4B      | 2.3018 | Gd4-O12D     | 2.1921 |
| Gd2-O7B      | 2.3138 | Gd4-O3E      | 2.3207 |
| Gd2-O4D      | 2.3018 |              |        |

Table S3. Selected bond angles [°] for *R-2*.

| bond angles | [°]    | bond angles  | [°]    |
|-------------|--------|--------------|--------|
| O1-Gd1-O3   | 58.12  | O4B-Gd2-O7   | 157.17 |
| O1-Gd1-O4   | 78.37  | O7-Gd2-O7B   | 71.33  |
| O1-Gd1-O1B  | 119.55 | O4D-Gd2-O7   | 123.22 |
| O1-Gd1-O3B  | 80.56  | O7-Gd2-O7D   | 71.33  |
| O1-Gd1-O4B  | 70.63  | O4B-Gd2-O7B  | 95.59  |
| O1-Gd1-O1D  | 119.55 | O4B-Gd2-O4D  | 75.62  |
| O1-Gd1-O3D  | 122.3  | O4B-Gd2-O7D  | 123.22 |
| O1-Gd1-O4D  | 133.48 | O4D-Gd2-O7B  | 157.17 |
| O3-Gd1-O4   | 103.83 | O7B-Gd2-O7D  | 71.33  |
| O1B-Gd1-O3  | 122.3  | O4D-Gd2-O7D  | 95.59  |
| O3-Gd1-O3B  | 65.52  | O7-Gd3-O10   | 109.99 |
| O3-Gd1-O4B  | 128.56 | O7-Gd3-O7B   | 68.22  |
| O1D-Gd1-O3  | 80.56  | O7-Gd3-O10B  | 78.02  |
| O3-Gd1-O3D  | 65.52  | O7-Gd3-O7D   | 68.22  |
| O3-Gd1-O4D  | 158.88 | O7-Gd3-O10D  | 144.33 |
| O1B-Gd1-O4  | 133.48 | O7B-Gd3-O10  | 144.33 |
| O3B-Gd1-O4  | 158.88 | O10-Gd3-O10B | 104.05 |
| O4-Gd1-O4B  | 67.6   | O7D-Gd3-O10  | 78.02  |
| O1D-Gd1-O4  | 70.63  | O10-Gd3-O10D | 104.05 |
| O3D-Gd1-O4  | 128.56 | O7B-Gd3-O10B | 109.99 |

| bond angles | [°]    | bond angles   | [°]    |
|-------------|--------|---------------|--------|
| O4-Gd1-O4D  | 67.6   | O7B-Gd3-O7D   | 68.22  |
| O1B-Gd1-O3B | 58.12  | O7B-Gd3-O10D  | 78.02  |
| O1B-Gd1-O4B | 78.37  | O7D-Gd3-O10B  | 144.33 |
| O1B-Gd1-O1D | 119.55 | O10B-Gd3-O10D | 104.05 |
| O1B-Gd1-O3D | 80.56  | O7D-Gd3-O10D  | 109.99 |
| O1B-Gd1-O4D | 70.63  | O3A-Gd4-O12   | 138.17 |
| O3B-Gd1-O4B | 103.83 | O12-Gd4-O12B  | 91.71  |
| O1D-Gd1-O3B | 122.3  | O3C-Gd4-O12   | 129.43 |
| O3B-Gd1-O3D | 65.52  | O12-Gd4-O12D  | 91.71  |
| O3B-Gd1-O4D | 128.56 | O3E-Gd4-O12   | 81.2   |
| O1D-Gd1-O4B | 133.48 | O3A-Gd4-O12B  | 81.2   |
| O3D-Gd1-O4B | 158.88 | O3A-Gd4-O3C   | 72.49  |
| O4B-Gd1-O4D | 67.6   | O3A-Gd4-O12D  | 129.43 |
| O1D-Gd1-O3D | 58.12  | O3A-Gd4-O3E   | 72.49  |
| O1D-Gd1-O4D | 78.37  | O3C-Gd4-O12B  | 138.17 |
| O3D-Gd1-O4D | 103.83 | O12B-Gd4-O12D | 91.71  |
| O4-Gd2-O7   | 95.59  | O3E-Gd4-O12B  | 129.43 |
| O4-Gd2-O4B  | 75.62  | O3C-Gd4-O12D  | 81.2   |
| O4-Gd2-O7B  | 123.22 | O3C-Gd4-O3E   | 72.49  |
| O4-Gd2-O4D  | 75.62  | O3E-Gd4-O12D  | 138.17 |
| O4-Gd2-O7D  | 157.17 |               |        |

Symmetry Code: A x, y,1+z; B 1-y,1+x-y, z; C 1-y,1+x-y,1+z; D -x+y,1-x, z; E -x+y,1-x,1+z

Table S4. Hydrogen bonds in **R-2**.

| D-H...A       | d(D-H) [Å] | d(H...A) [Å] | d(D...A) [Å] | <DHA [°] |
|---------------|------------|--------------|--------------|----------|
| N1-H3...O3    | 1.04       | 1.97         | 2.6960       | 124      |
| N1-H4 ...O6   | 1.33       | 1.18         | 2.4967       | 171      |
| N2- H19...O9  | 1.10       | 1.5          | 2.5896       | 172      |
| N2-H20...O1   | 1.08       | 1.53         | 2.5712       | 160      |
| N3-H33...O10  | 1.05       | 1.88         | 2.8828       | 158      |
| N3-H34...O5   | 1.09       | 1.51         | 2.5638       | 161      |
| N4-H51...O8   | 1.12       | 1.43         | 2.5252       | 164      |
| N4-H181...O12 | 1.04       | 2.28         | 2.8907       | 116      |

Table S5. C-H... $\pi$  interactions in **R-2**.

|                  | C-H... $\pi$ [°] | d(H... $\pi$ ) [Å] | d(C... $\pi$ ) [Å] |
|------------------|------------------|--------------------|--------------------|
| C26-H27... $\pi$ | 150              | 2.85               | 3.8332             |
| C28-H28... $\pi$ | 159              | 2.76               | 3.7610             |
| C30-H29... $\pi$ | 169              | 2.72               | 3.7980             |

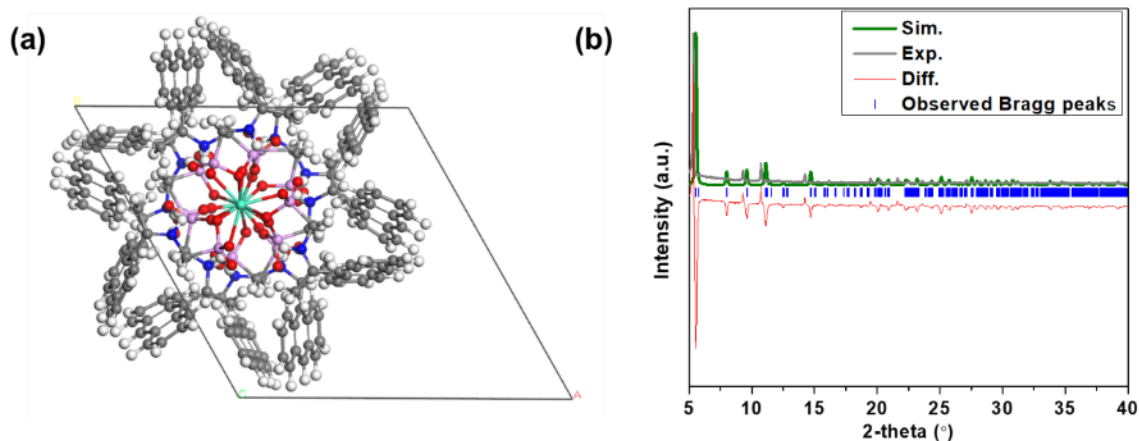

Figure S20. The optimized crystal structure and PXRD simulation results of **R-2**.

The **R-2\*** simulated models were optimized using the Perdew-Burke-Ernzerh (PBE)<sup>1</sup> functional within the Vienna Ab initio Simulation Package (VASP).<sup>2</sup> A plane-wave basis set with a cut-off energy of 450 eV was employed. Convergence thresholds for energy and force were established at  $1 \times 10^{-5}$  eV and  $-0.02$  eV  $\text{\AA}^{-1}$ , respectively, as demonstrated in Figure S19a.

For PXRD simulations, we utilized the Powder Refinement feature in the Reflex module of Materials Studio software.<sup>3</sup> Peak shapes were fitted using the Pseudo-Voigt function, with FWHM parameters set to  $U = 0.22$ ,  $V = -0.16$ , and  $W = 0.03$ . PXRD simulations were conducted by comparing the calculated spectra (green lines) with the experimental data (gray lines) of **R-2\***, shown in Figure S19b, revealing a slight rightward shift of the peaks.

References:

- (1) John, P.; Perdew, K. B.; Matthias, E. Generalized Gradient Approximation Made Simple. *Phys. Rev. Lett.* 1996, 77, 3865-3868.
- (2) Kresse, G.; Furthmüller, J. Efficiency of ab-initio total energy calculations for metals and semiconductors using a plane-wave basis set. *Comput. Mater. Sci.* 1996, 6, 15-50.
- (3) Materials Studio, version 7.0; Accelrys Inc.: San Diego, 2013.



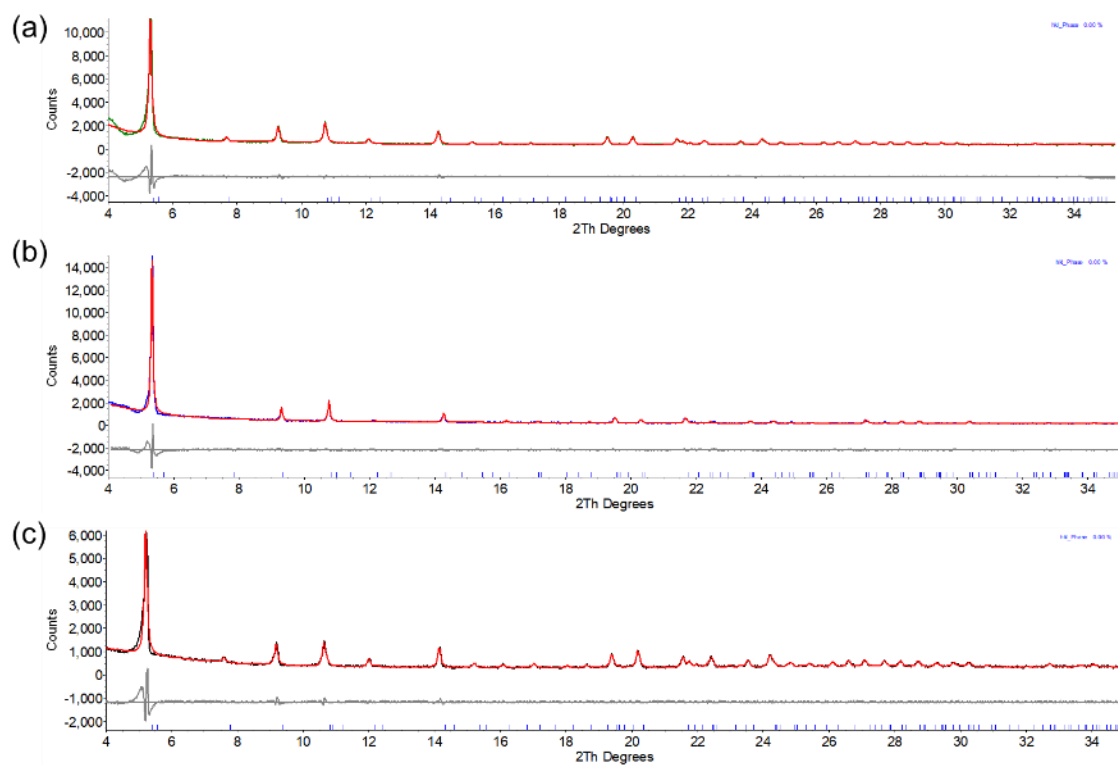

Figure S21. Pawley fits of powder samples of **R-1** (a), **R-2** (b), **R-3** (c) performed using Topas 5.0 program.

Fitted cell parameters for **R-1**:  $P3$ ,  $a = 18.85 \text{ \AA}$ ,  $c = 15.82 \text{ \AA}$ ,  $V = 4870.24 \text{ \AA}^3$ , Rwp 9.295;

Fitted cell parameters for **R-2**:  $P3$ ,  $a = 18.86 \text{ \AA}$ ,  $c = 15.29 \text{ \AA}$ ,  $V = 4764.21 \text{ \AA}^3$ , Rwp 9.937;

Fitted cell parameters for **R-3**:  $P3$ ,  $a = 18.87 \text{ \AA}$ ,  $c = 15.80 \text{ \AA}$ ,  $V = 4872.6 \text{ \AA}^3$ , Rwp 8.09.

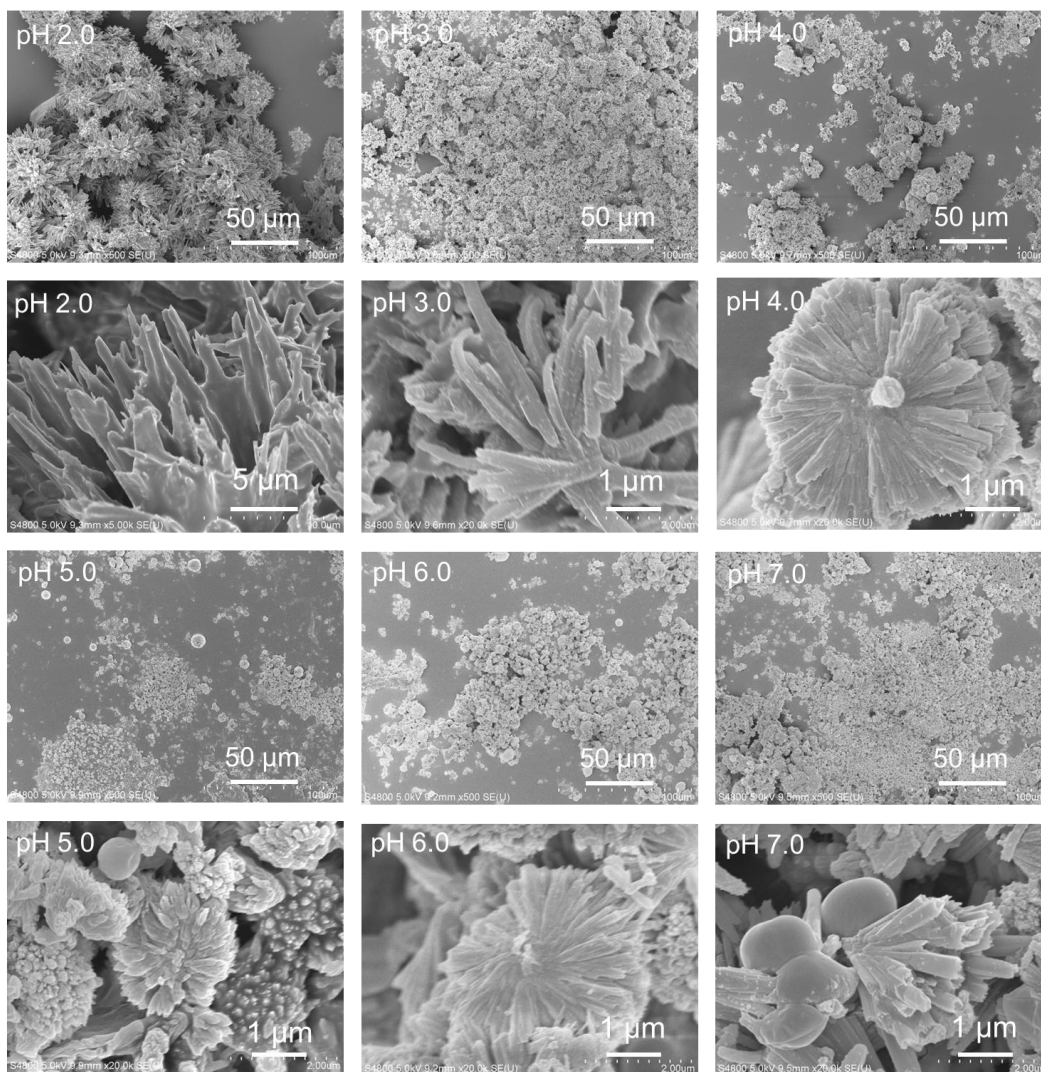

Figure S22. SEM images showing the morphology of the  $Gd(NO_3)_3/R-AnempH_2$  assemblies obtained at different pH under hydrothermal conditions at  $120^\circ C$  for 24h.

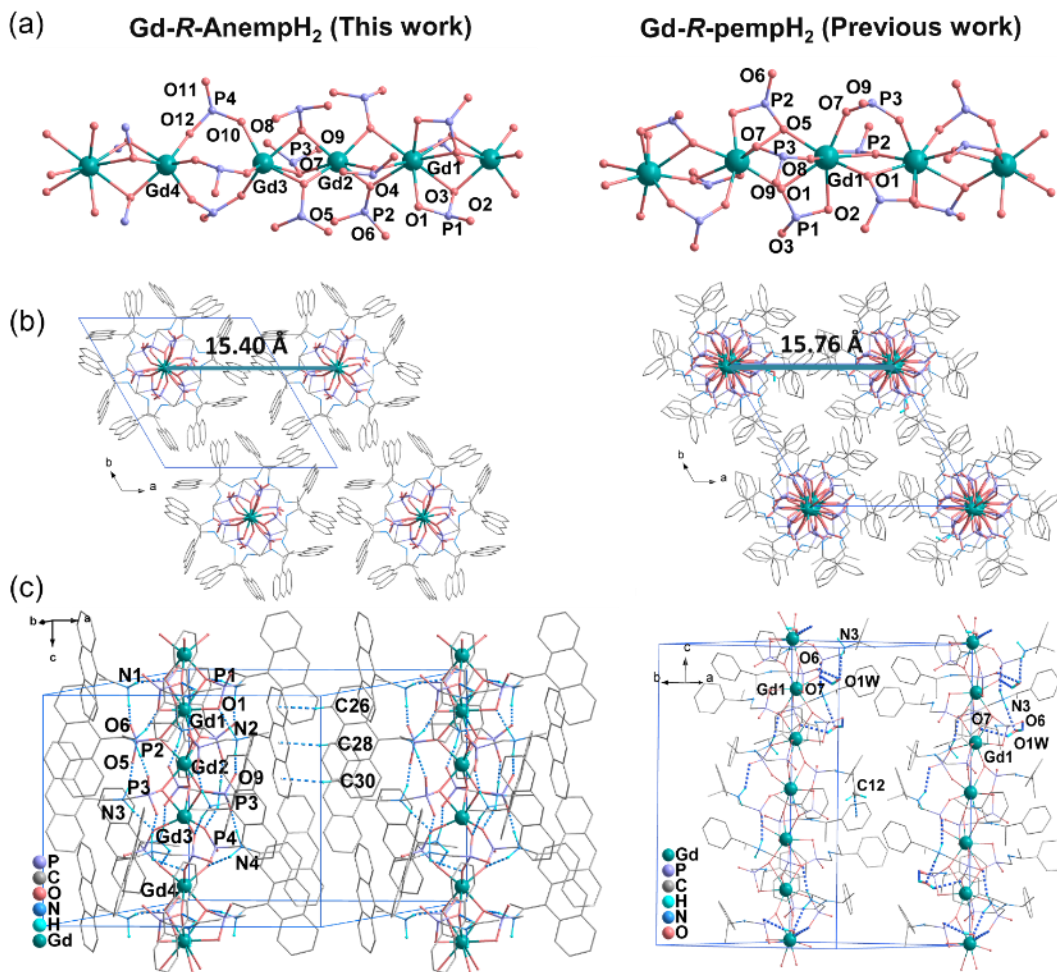

Figure S23. The structure of ***R*-2** (left) and Gd(*R*-pempH)<sub>3</sub>·1.5H<sub>2</sub>O (right). (a) the fragment of the chain structure in ***R*-2** and Gd(*R*-pempH)<sub>3</sub>·1.5H<sub>2</sub>O, ball and stick representation with atomic labelling. All C and N atoms are omitted for clarity. (b) interchain distances and (c) packing diagrams of structures of ***R*-2** and Gd(*R*-pempH)<sub>3</sub>·1.5H<sub>2</sub>O. The dotted lines represent the hydrogen bonding interactions and C-H... $\pi$  interaction. The structure of Gd(*R*-pempH)<sub>3</sub>·1.5H<sub>2</sub>O is adapted from ref..

#### IV. The influence of reaction conditions on the spiral bundles

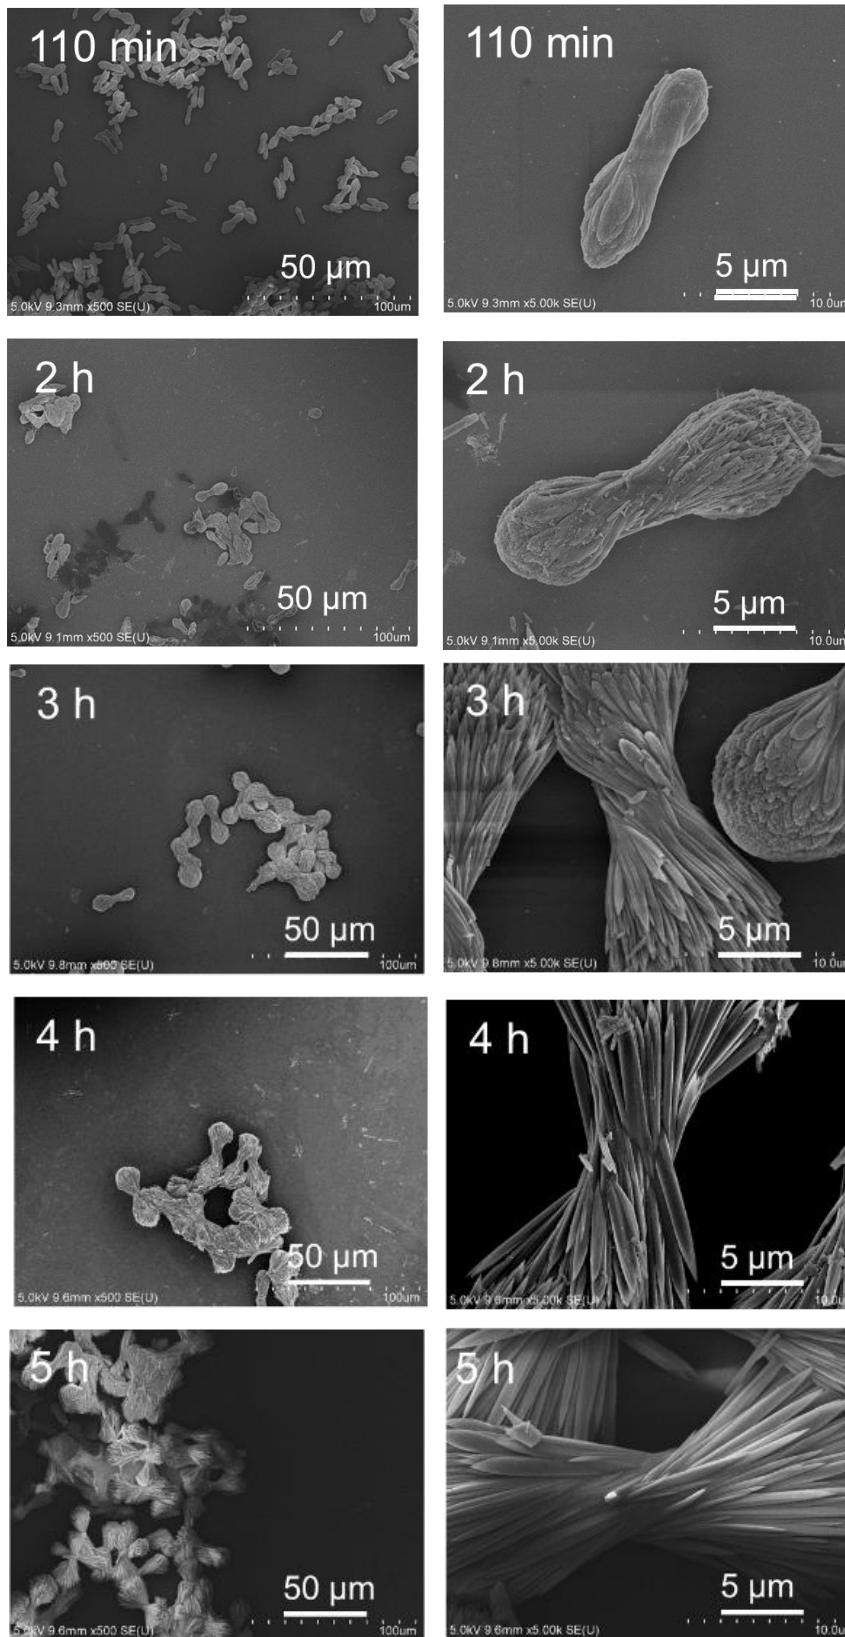

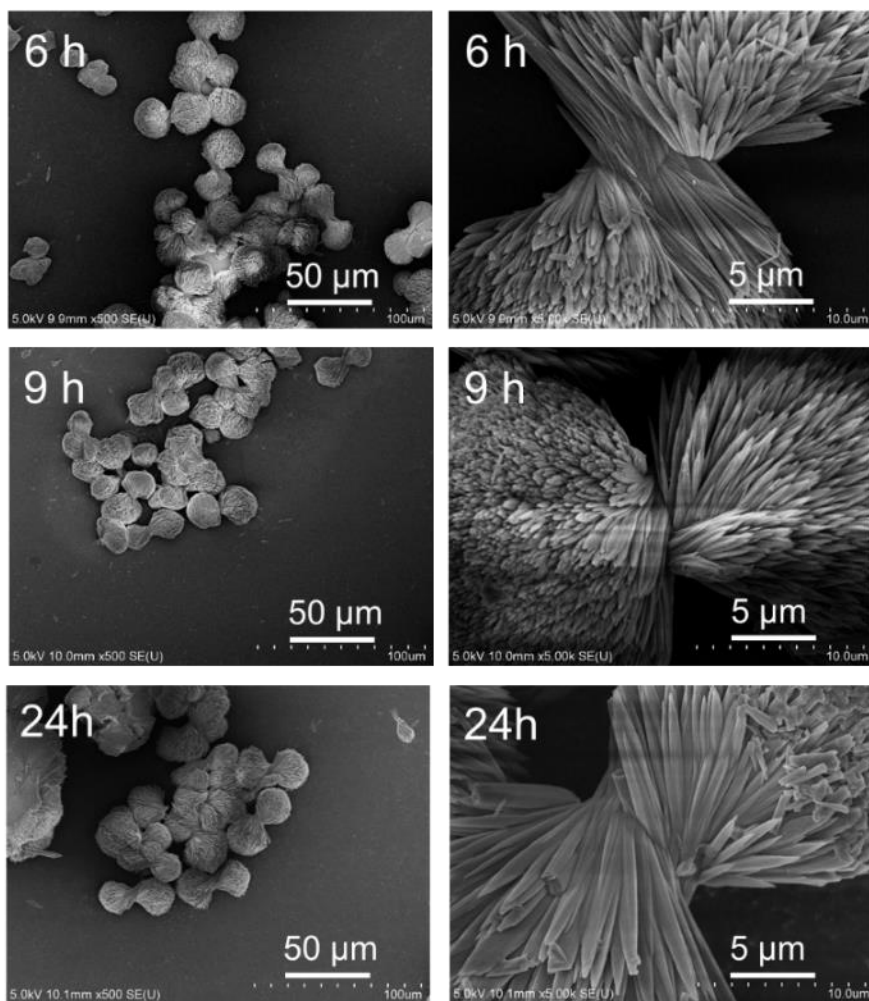

Figure S24. SEM images showing the morphology of the  $\text{Gd}(\text{NO}_3)_3/\text{R-AnempH}_2$  assemblies obtained in 90 vol % NPA / DMF (total volume 5 mL) and 0.5 mL water after reaction for different period of time.

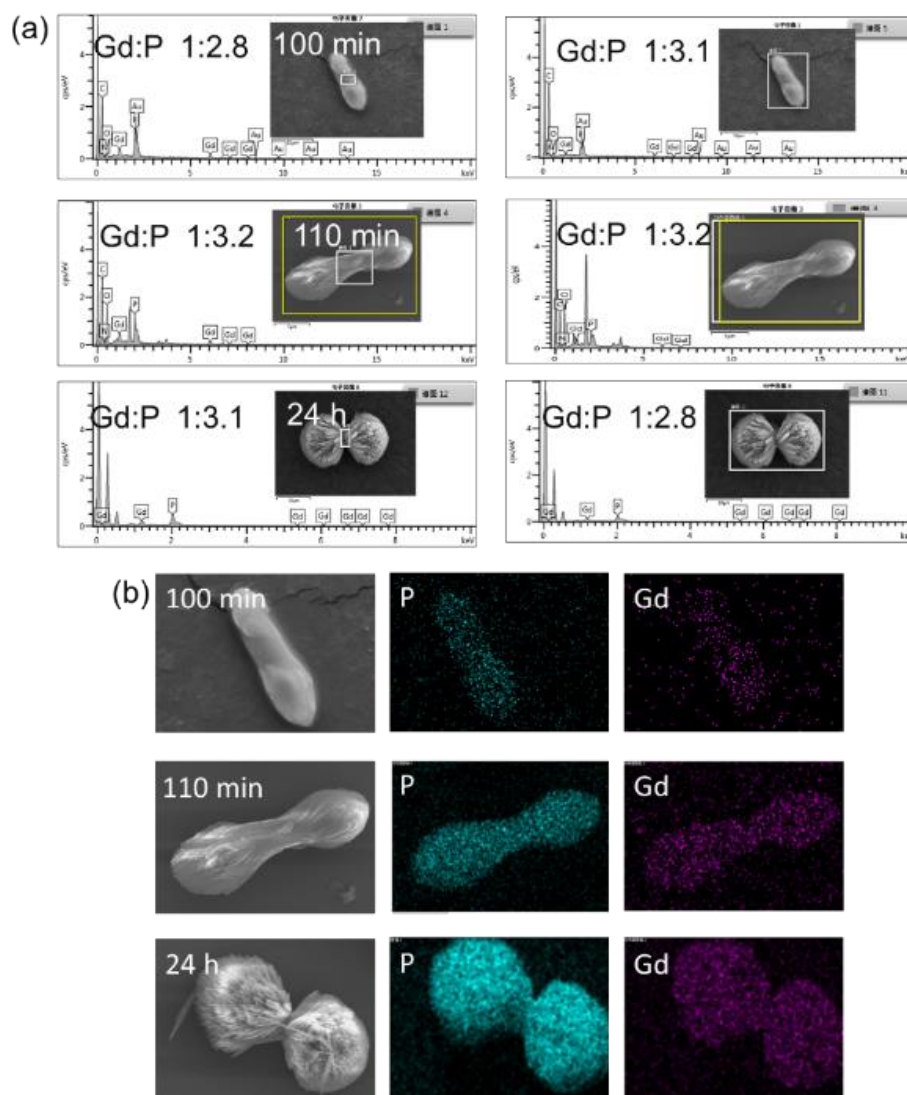

Figure S25. (a) EDS result and (b) mapping images of the  $\text{Gd}(\text{NO}_3)_3/\text{R-AnempH}_2$  assemblies obtained in 90 vol % NPA / DMF (total volume 5 mL) and 0.5 mL water after reaction for different period of time.

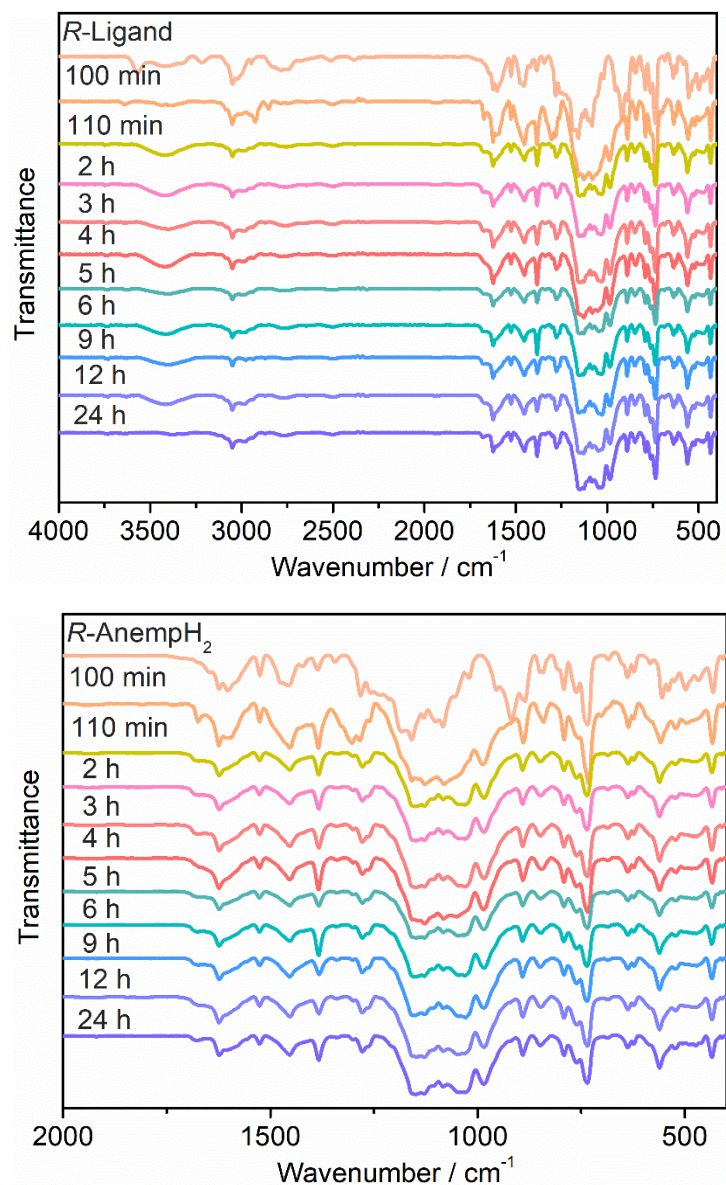

Figure S26. IR spectra of the  $\text{Gd}(\text{NO}_3)_3/\text{R-AnempH}_2$  assemblies obtained in 90 vol % NPA / DMF (total volume 5 mL) and 0.5 mL water after reaction for different period of time. up: 4000-400  $\text{cm}^{-1}$ , bottom: 2000-400  $\text{cm}^{-1}$ .

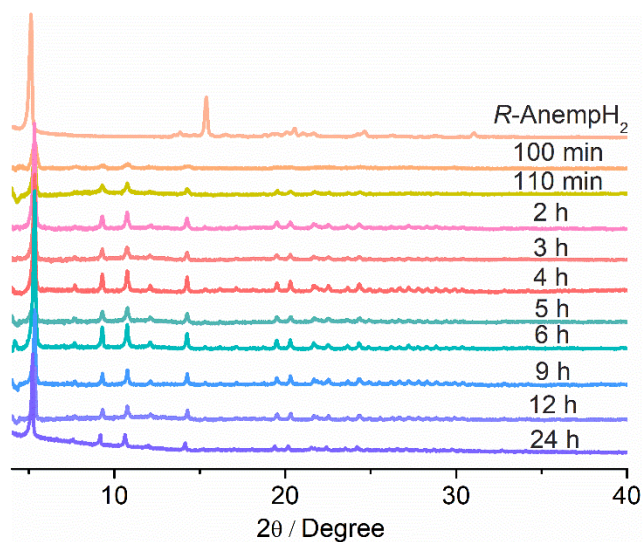

Figure S27. PXRD patterns of the  $\text{Gd}(\text{NO}_3)_3/\text{R-AnempH}_2$  assemblies obtained in 90 vol % NPA / DMF (total volume 5 mL) and 0.5 mL water after reaction for different period of time.

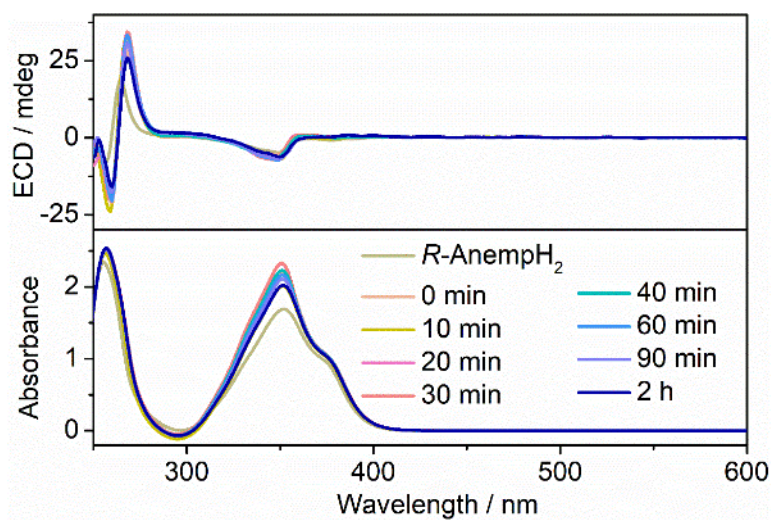

Figure S28. ECD spectra of the solutions after reacting  $\text{Gd}(\text{NO}_3)_3$  with  $R\text{-AnempH}_2$  in 90 vol % NPA / DMF (total volume 5 mL) and 0.5 mL water for different period of time. The measurements were performed on a JASCO J-810 spectrophotometer.



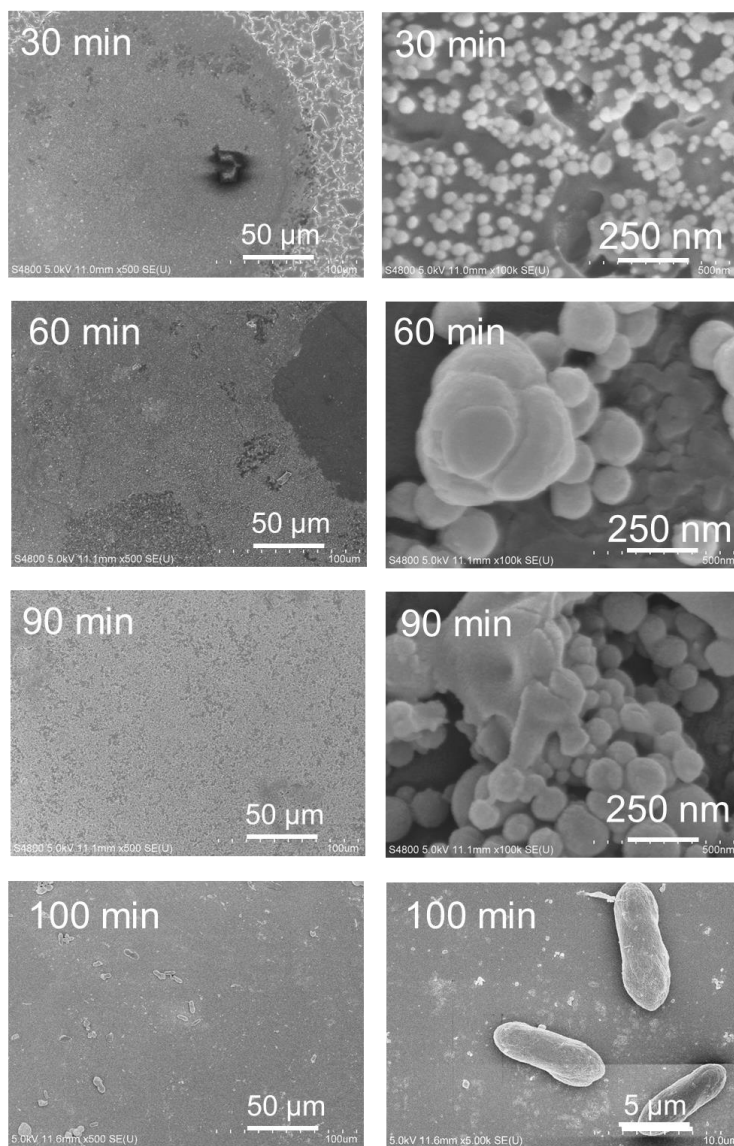

Figure S29. SEM images showing the morphology of products at different reaction time.

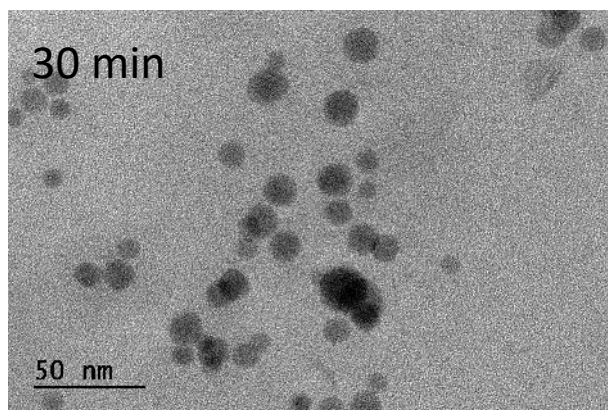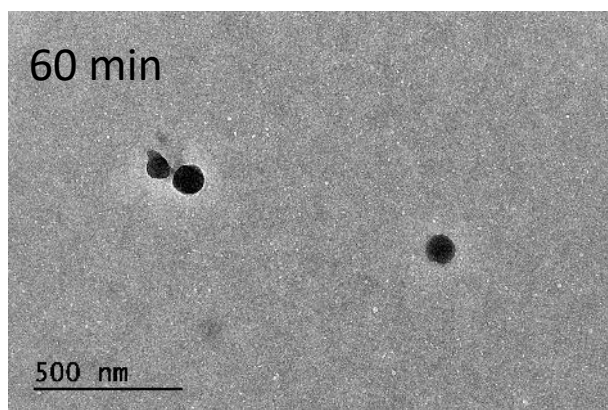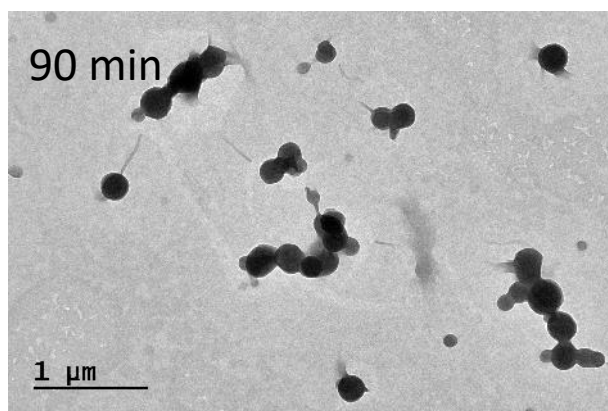

Figure S30. TEM images showing the morphology of products at different reaction time.

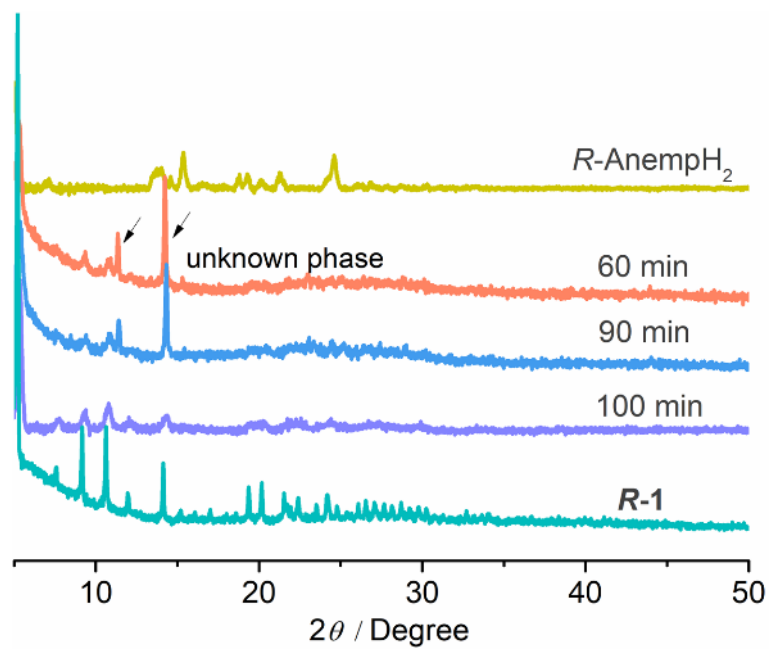

Figure S31. PXRD patterns of the residues after solvent evaporation of the reaction solutions at different reaction time.

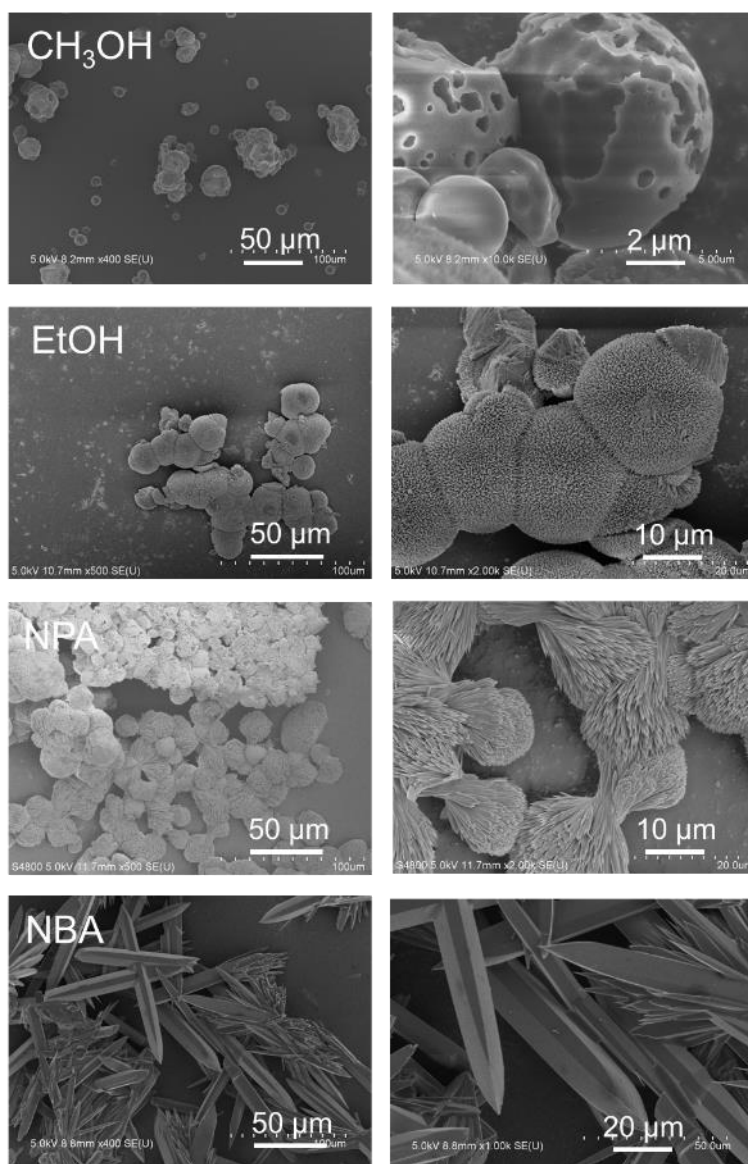

Figure S32. SEM images showing the morphology of the  $Gd(NO_3)_3/R-AnempH_2$  (1:3) assemblies obtained in 90 vol % alcohol / DMF (total volume 5 mL) and 0.5 mL water at 100°C using different alcohol ( $CH_3OH$ , EtOH, NPA, NBA).

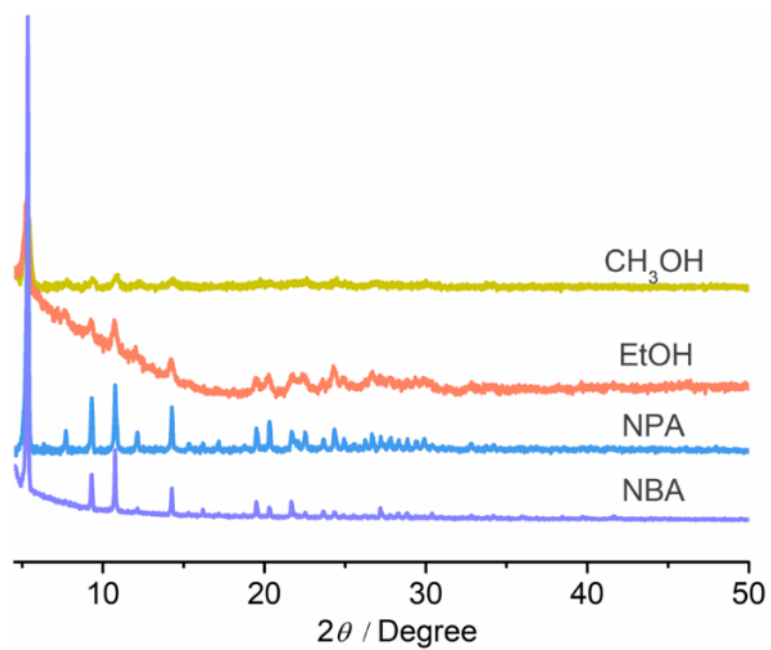

Figure S33. PXRD patterns of the  $\text{Gd}(\text{NO}_3)_3/\text{R-AnempH}_2$  (1:3) assemblies obtained in 90 vol % alcohol / DMF (total volume 5 mL) and 0.5 mL water at 100°C using different alcohol ( $\text{CH}_3\text{OH}$ , EtOH, NPA, NBA).

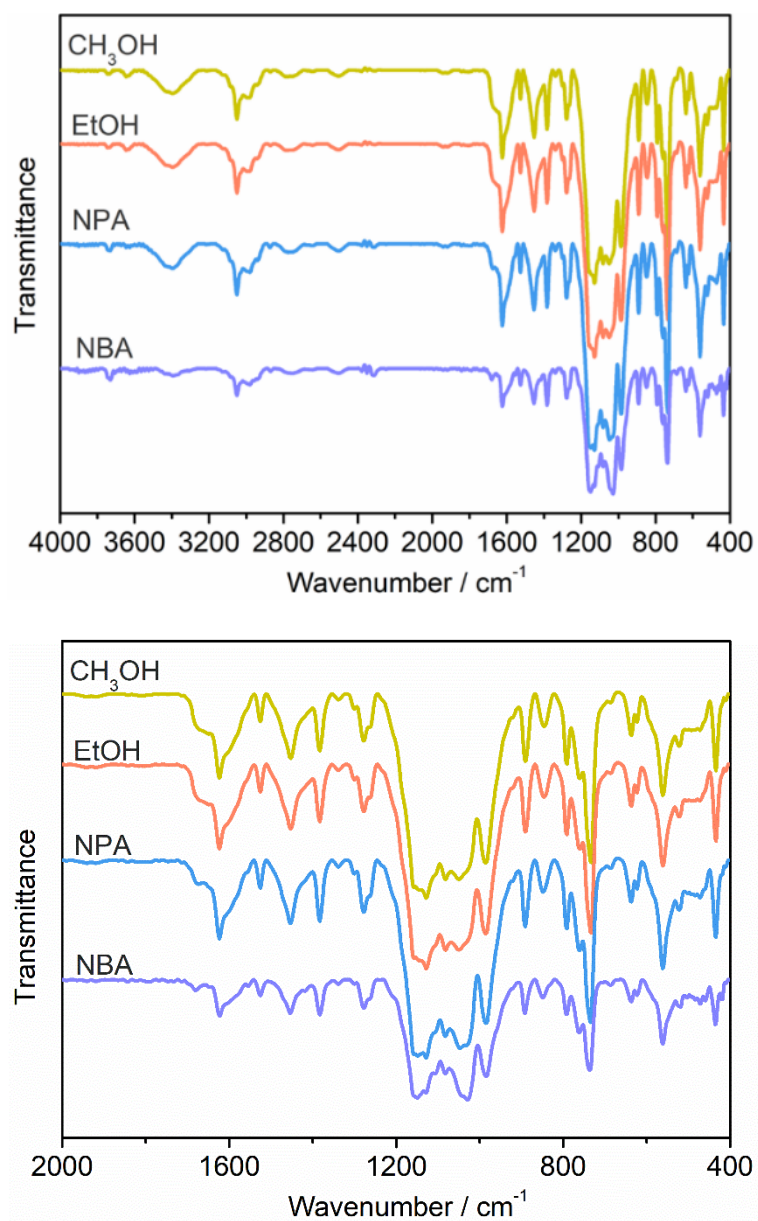

Figure S34. IR spectra of the  $\text{Gd}(\text{NO}_3)_3/\text{R-AnempH}_2$  (1:3) assemblies obtained in 90 vol % alcohol / DMF (total volume 5 mL) and 0.5 mL water at 100°C using different alcohol ( $\text{CH}_3\text{OH}$ , EtOH, NPA, NBA). Up: 4000-400  $\text{cm}^{-1}$ , bottom: 2000-400  $\text{cm}^{-1}$ .

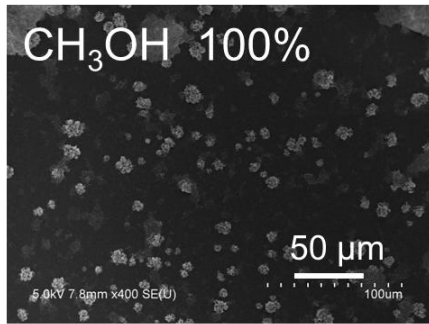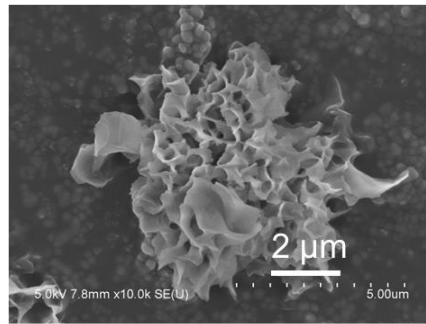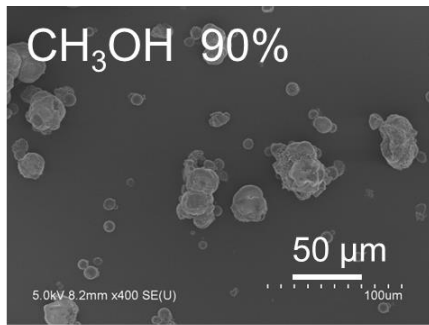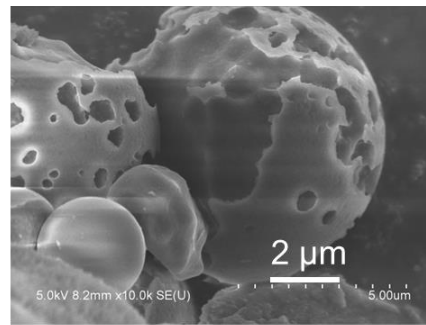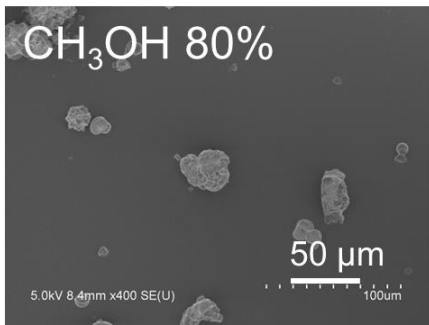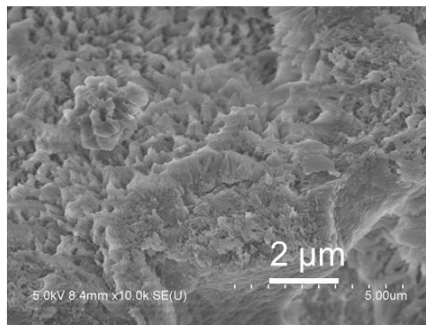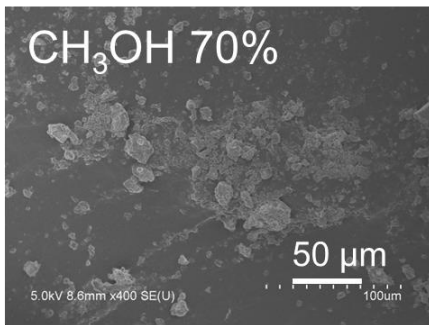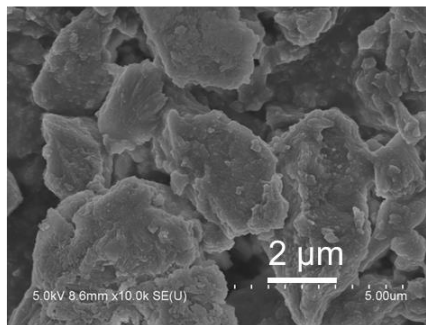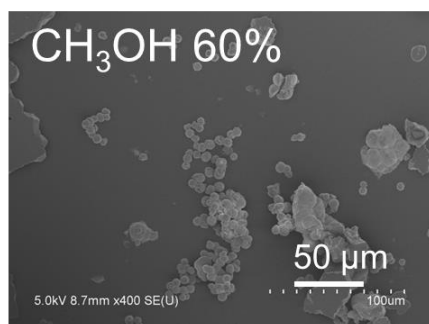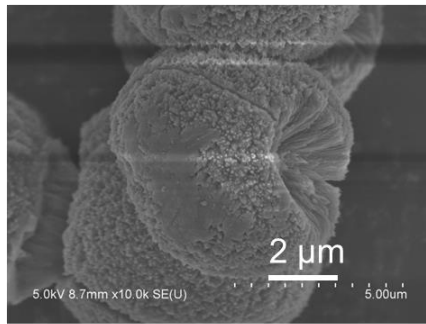

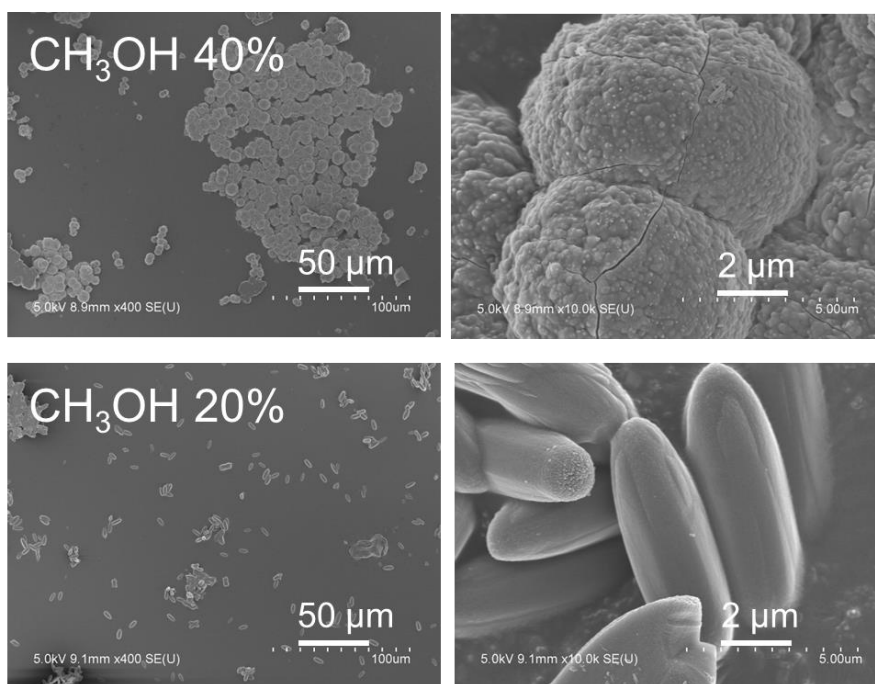

Figure S35. SEM images showing the morphology of the  $\text{Gd}(\text{NO}_3)_3/\text{R-AnempH}_2$  (1:3) assemblies obtained in different volume ratio of  $\text{CH}_3\text{OH}$  / DMF (total volume 5 mL) and 0.5 mL water at  $100^\circ\text{C}$ .



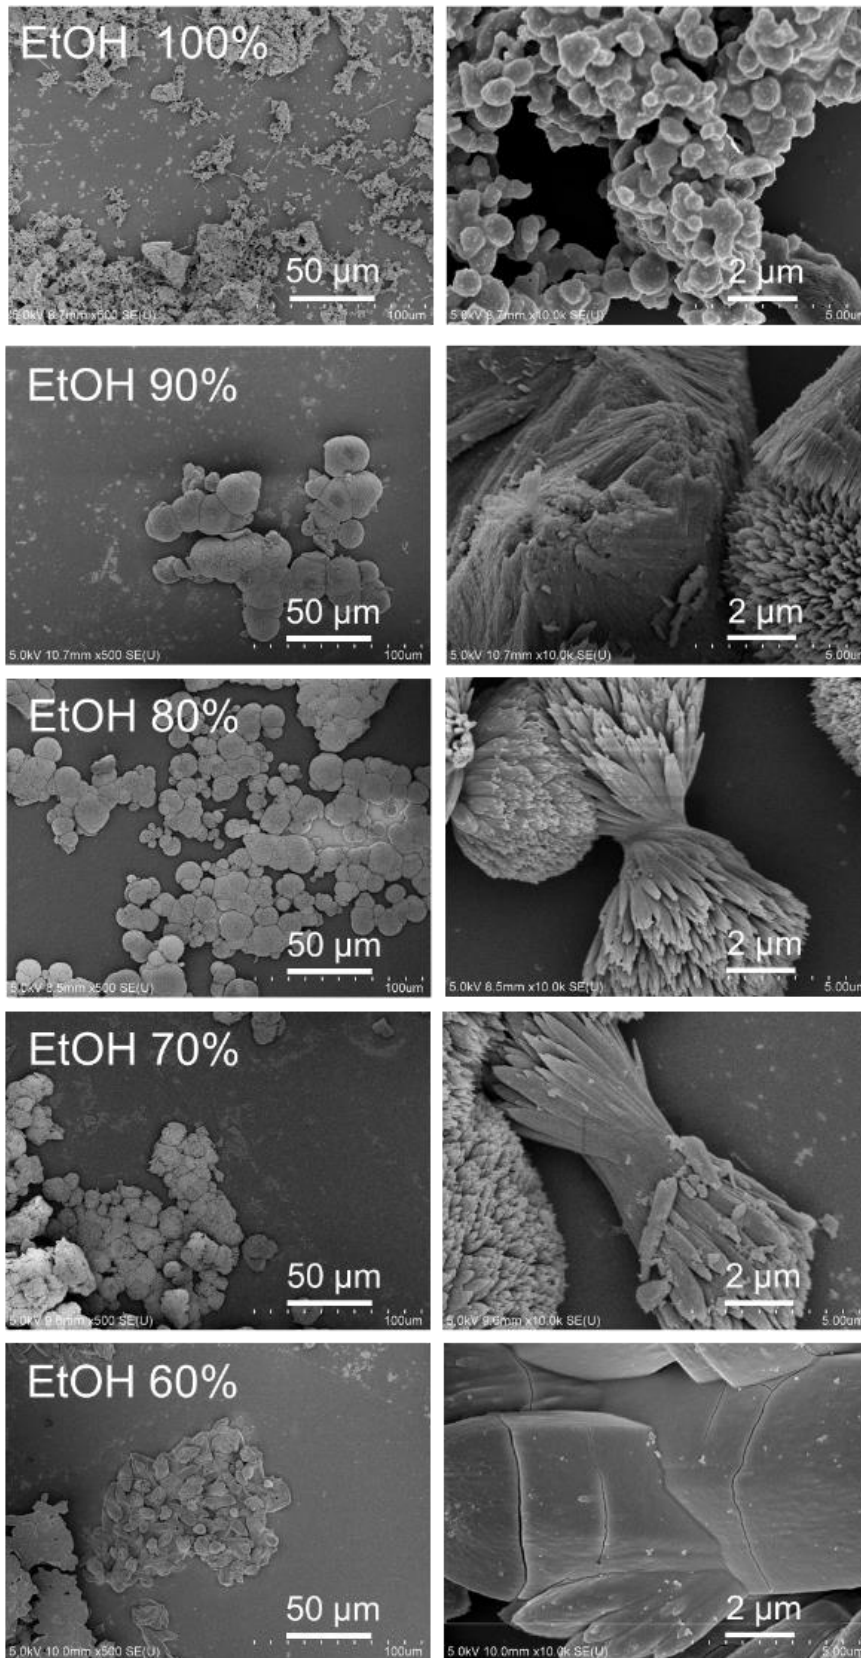

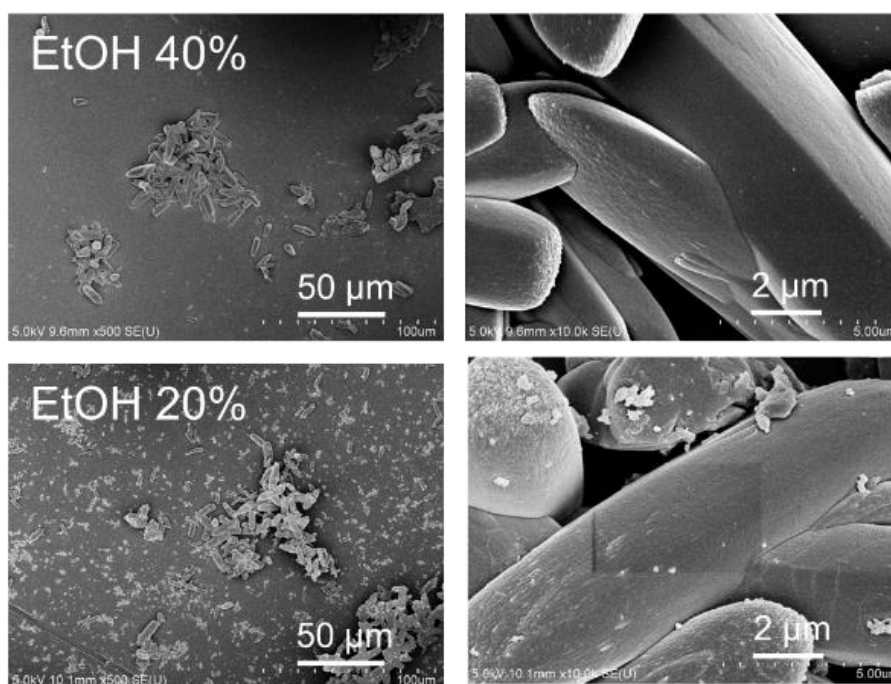

Figure S36. SEM images showing the morphology of the  $\text{Gd}(\text{NO}_3)_3/\text{R-AnempH}_2$  (1:3) assemblies obtained in different volume ratio of EtOH / DMF (total volume 5 mL) and 0.5 mL water at 100°C.

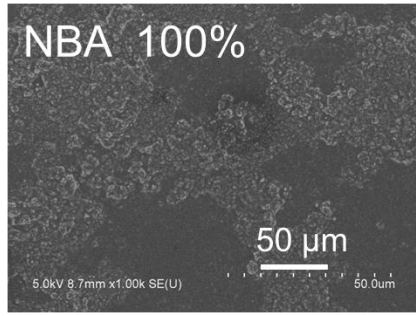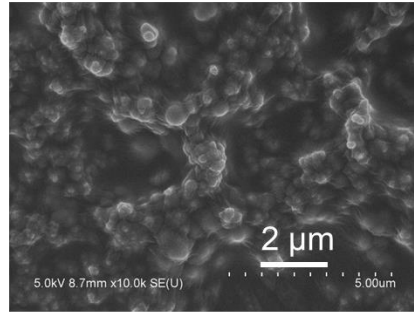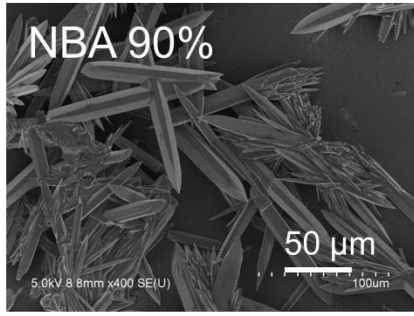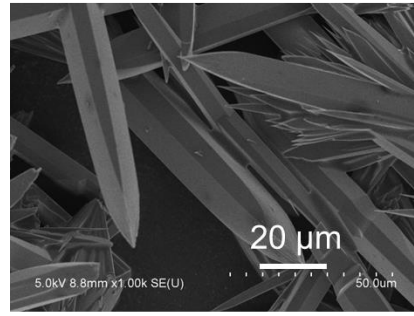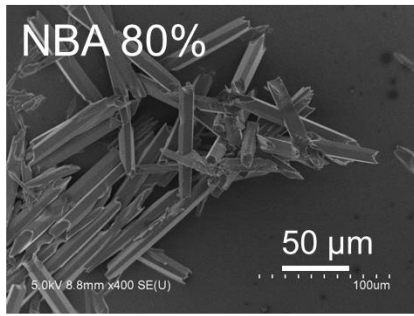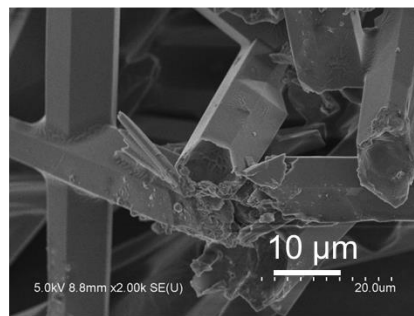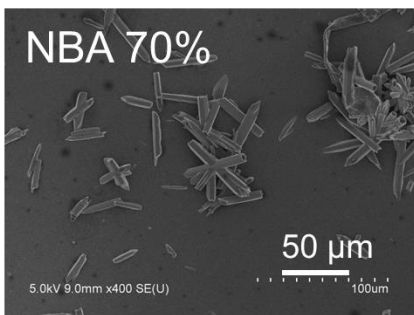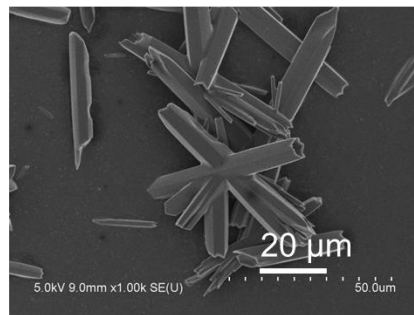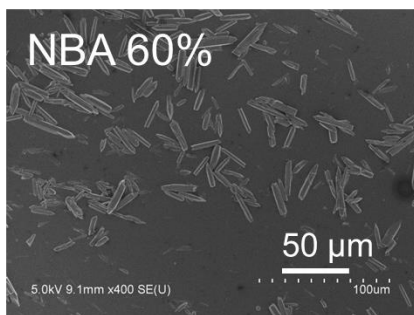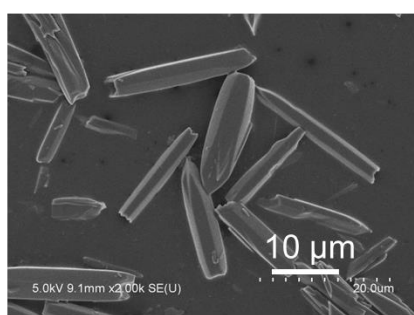

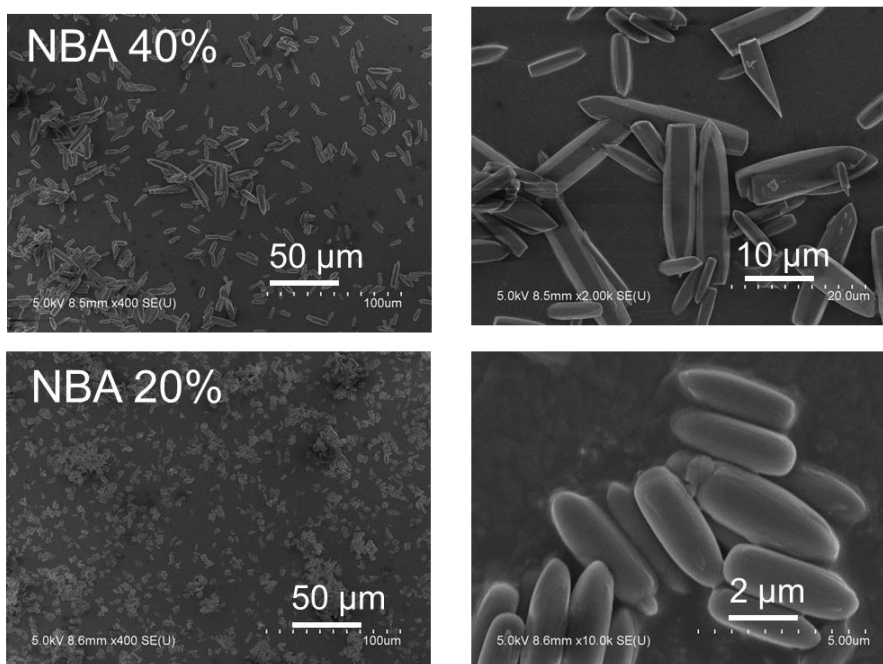

Figure S37. SEM images showing the morphology of the  $\text{Gd}(\text{NO}_3)_3/\text{R-AnempH}_2$  (1:3) assemblies obtained in different volume ratio of NBA / DMF (total volume 5 mL) and 0.5 mL water at 100°C.

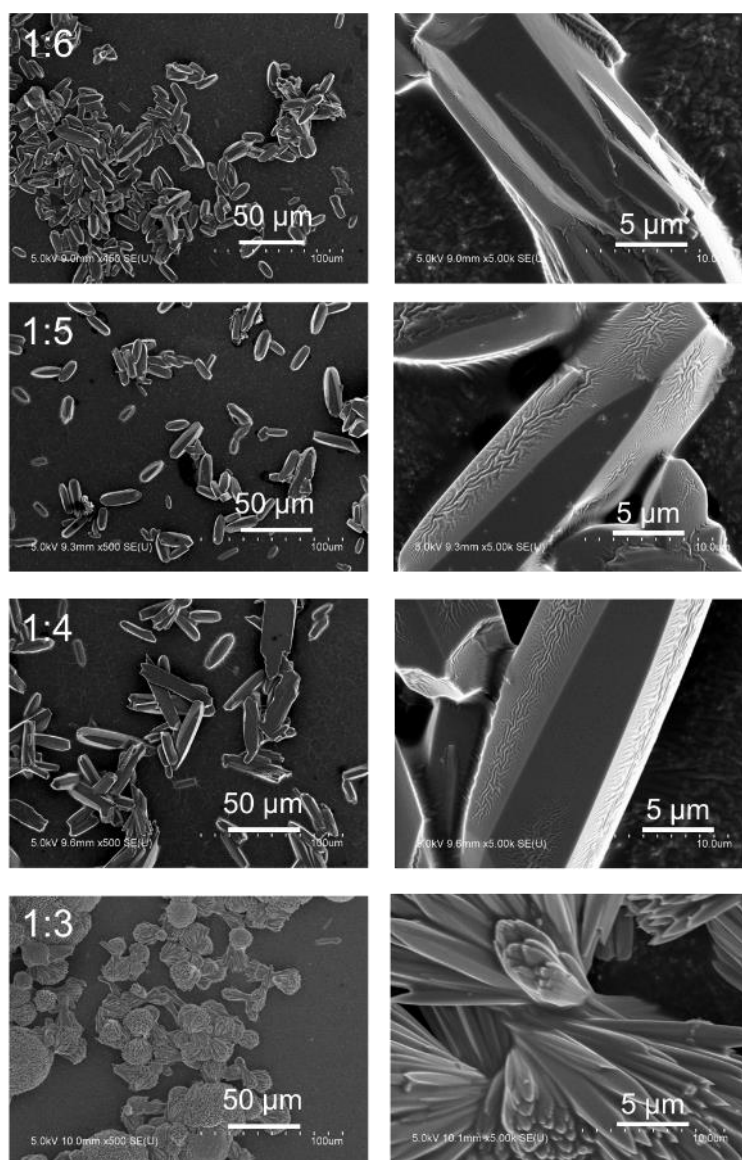

Figure S38. SEM images showing the morphology of the  $\text{Gd}(\text{NO}_3)_3/\text{R-AnempH}_2$  assemblies with different molar ratios (1:6, 1:5, 1:4, 1:3) obtained in 90 vol % NPA / DMF (total volume 5 mL) and 0.5 mL water at 100°C.

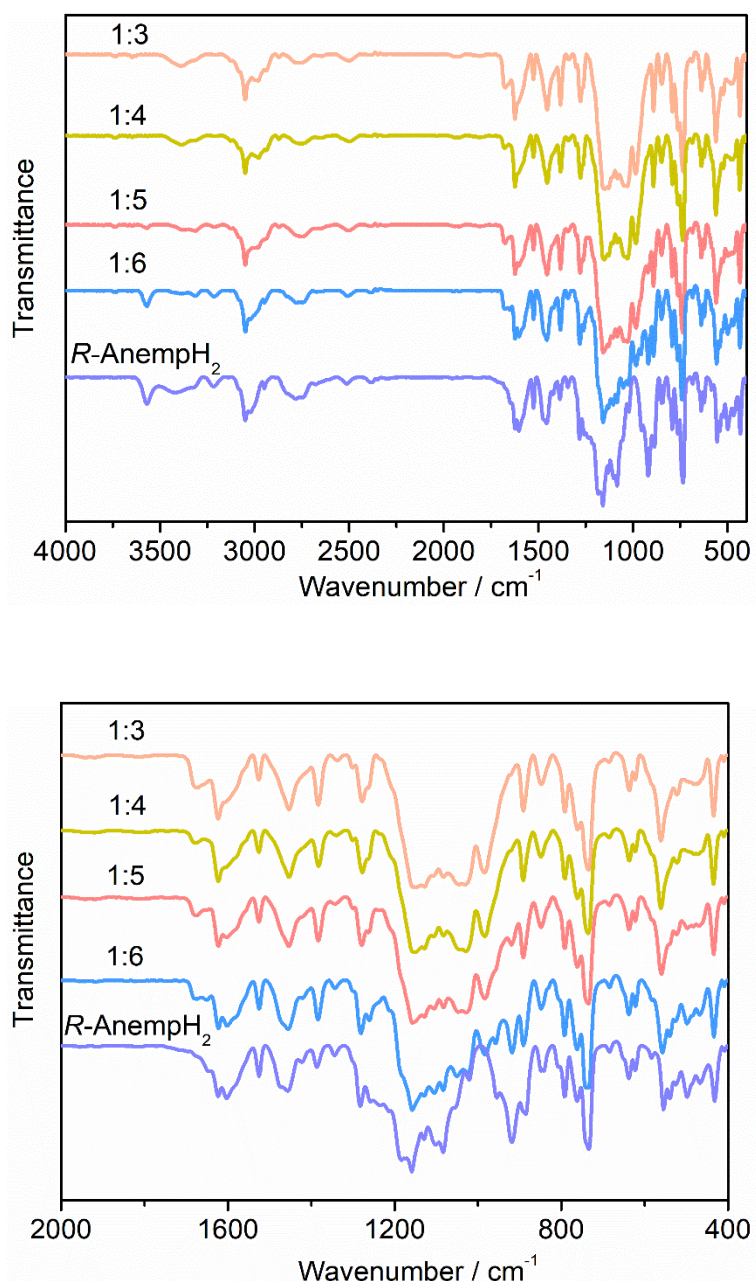

Figure S39. IR spectra of the  $\text{Gd}(\text{NO}_3)_3/\text{R-AnempH}_2$  assemblies with different molar ratios (1:6, 1:5, 1:4, 1:3) obtained in 90 vol % NPA / DMF (total volume 5 mL) and 0.5 mL water at  $100^\circ\text{C}$ . Up: 4000-400  $\text{cm}^{-1}$ , bottom: 2000-400  $\text{cm}^{-1}$ . When ligands were in excess (1:5 and 1:6), there appear peaks at 1603  $\text{cm}^{-1}$ , 1200-800  $\text{cm}^{-1}$ , and 464  $\text{cm}^{-1}$  corresponding to the unreacted ligands.

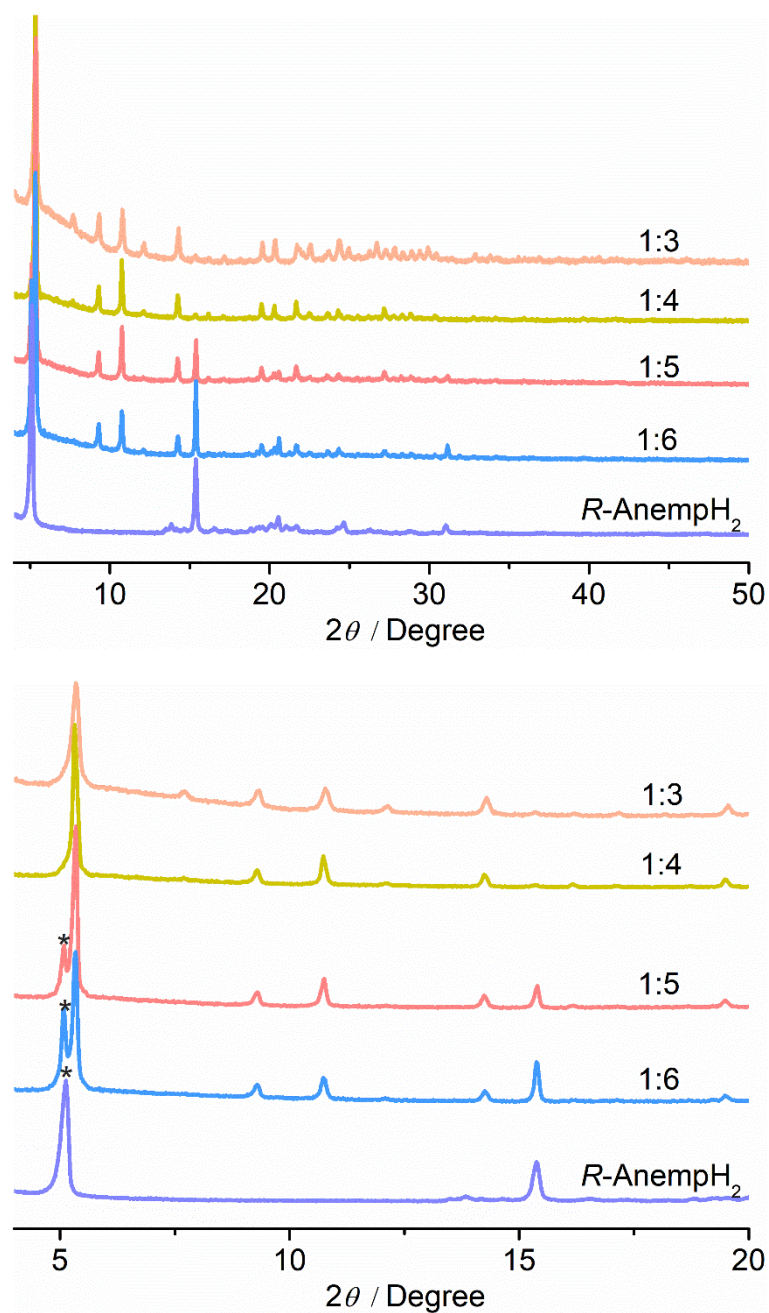

Figure S40. PXRD patterns of the  $\text{Gd}(\text{NO}_3)_3/\text{R-AnempH}_2$  assemblies with different molar ratios (1:6, 1:5, 1:4, 1:3) obtained in 90 vol % NPA / DMF (total volume 5 mL) and 0.5 mL water at 100°C (up:  $2\theta$  4-50°, bottom:  $2\theta$  4-20°).

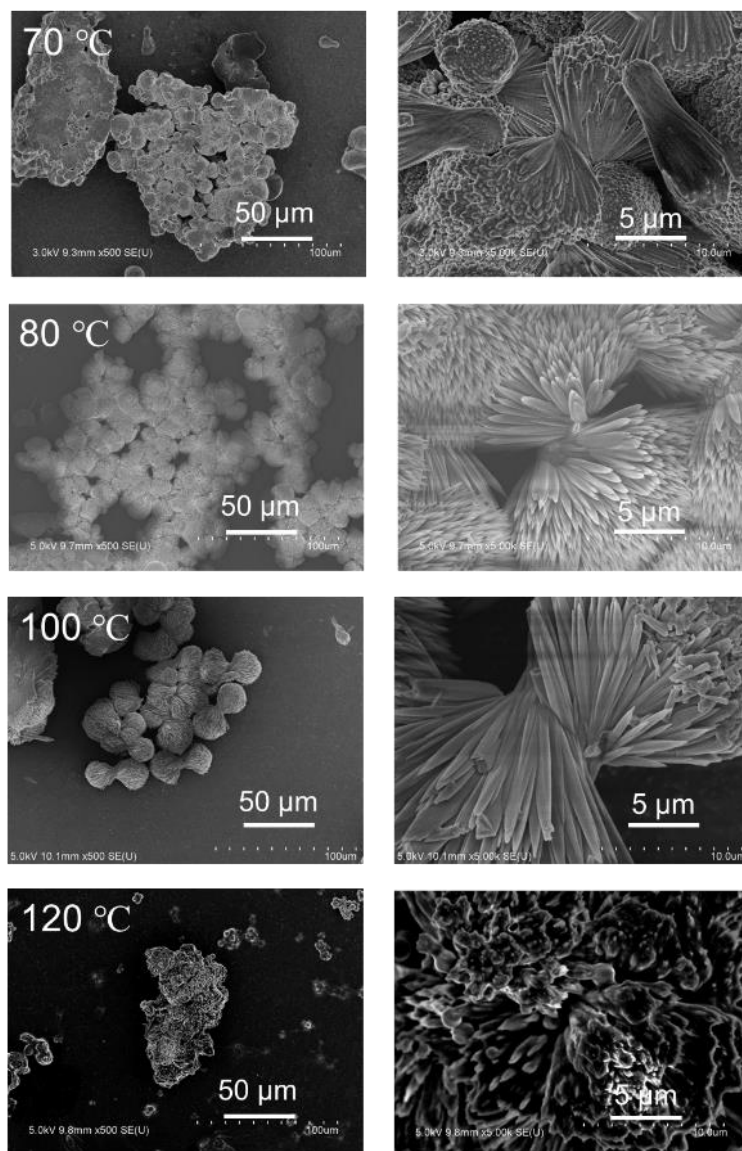

Figure S41. SEM images showing the morphology of the  $\text{Gd}(\text{NO}_3)_3/\text{R-AnempH}_2$  (1:3) assemblies obtained in 90 vol % NPA / DMF (total volume 5 mL) and 0.5 mL water at different temperatures.



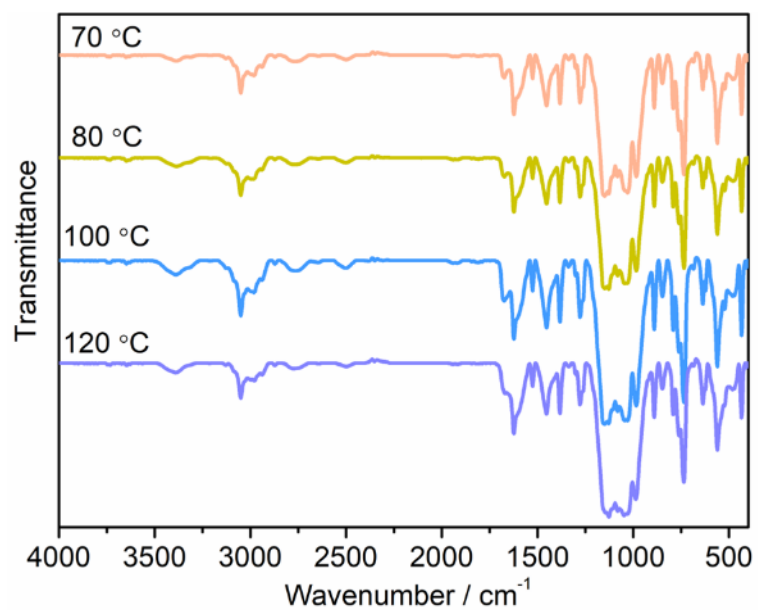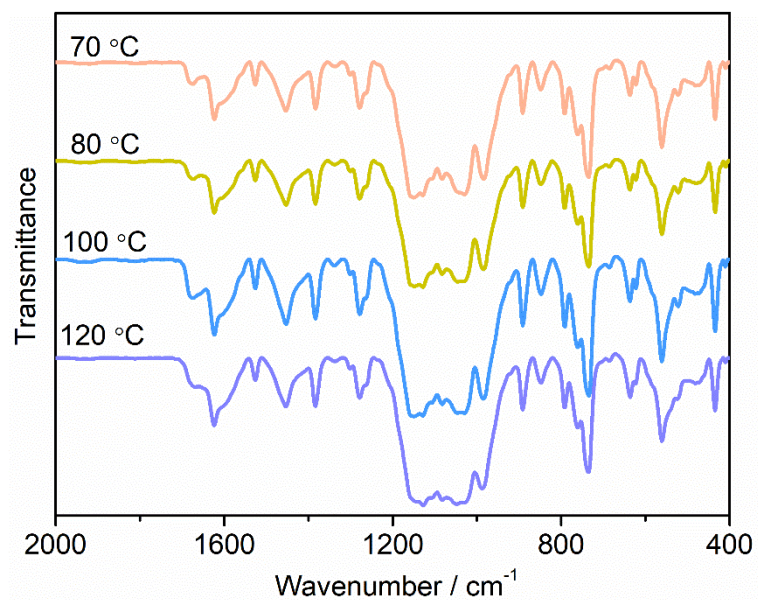

Figure S42. IR spectra of the  $\text{Gd}(\text{NO}_3)_3/\text{R-AnempH}_2$  (1:3) assemblies obtained in 90 vol % NPA / DMF (total volume 5 mL) and 0.5 mL water at different temperatures, up 4000-400  $\text{cm}^{-1}$ , bottom: 2000-400  $\text{cm}^{-1}$ .

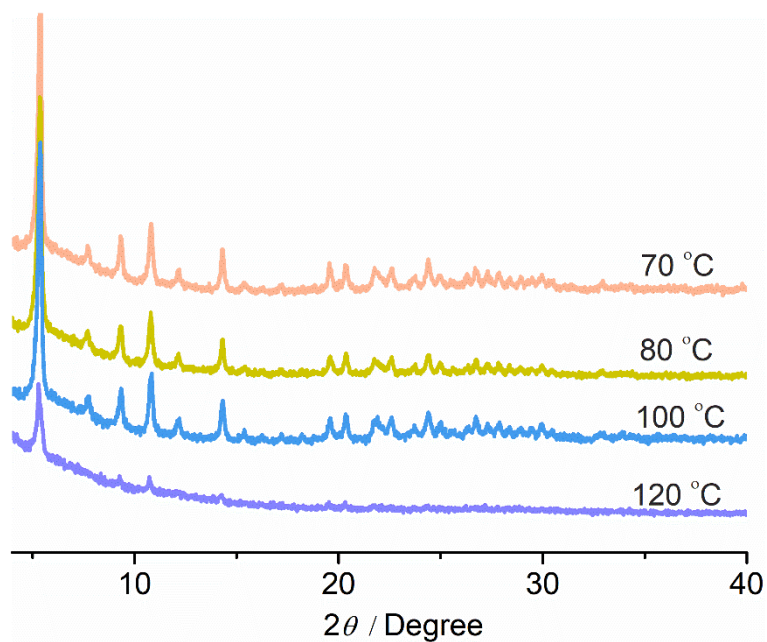

Figure S43. PXRD patterns of the  $\text{Gd}(\text{NO}_3)_3/\text{R-AnempH}_2$  (1:3) assemblies obtained in 90 vol % NPA / DMF (total volume 5 mL) and 0.5 mL water at different temperatures.

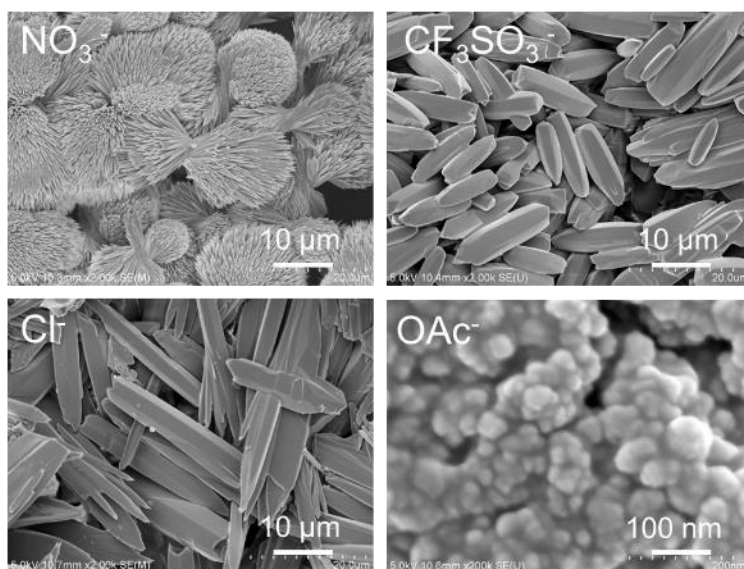

Figure S44. SEM images of the  $\text{GdX}_3/\text{R-AnempH}_2$  (1:3) assemblies obtained in 90 vol % NPA / DMF (total volume 5 mL) and 0.5 mL water at 100 °C using different gadolinium salt [ $\text{Gd}(\text{NO}_3)_3$ ,  $\text{GdCl}_3$ ,  $\text{Gd}(\text{OAc})_3$  and  $\text{Gd}(\text{CF}_3\text{SO}_3)_3$ ].

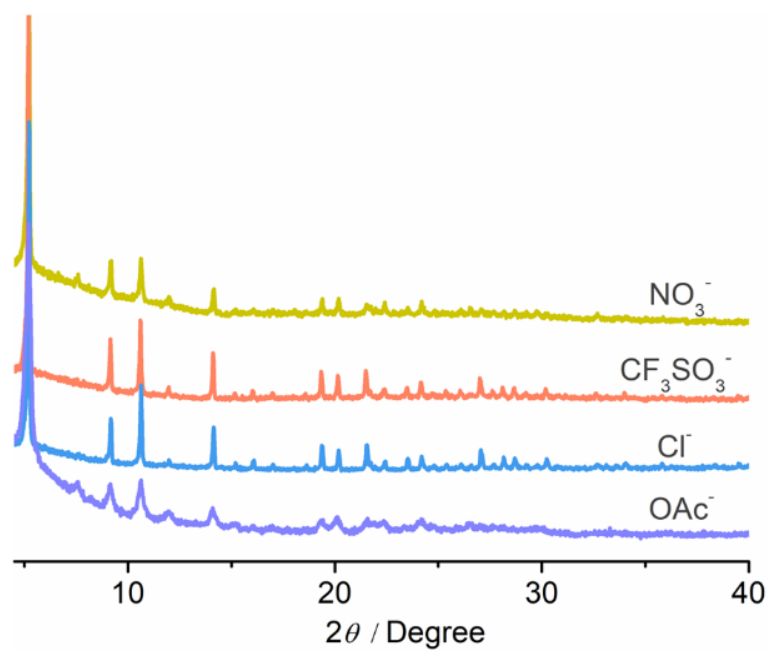

Figure S45. PXRD patterns of the GdX<sub>3</sub>/R-AnempH<sub>2</sub> (1:3) assemblies obtained in 90 vol % NPA / DMF (total volume 5 mL) and 0.5 mL water at 100 °C using different gadolinium salt [Gd(NO<sub>3</sub>)<sub>3</sub>, GdCl<sub>3</sub>, Gd(OAc)<sub>3</sub> and Gd(CF<sub>3</sub>SO<sub>3</sub>)<sub>3</sub>].

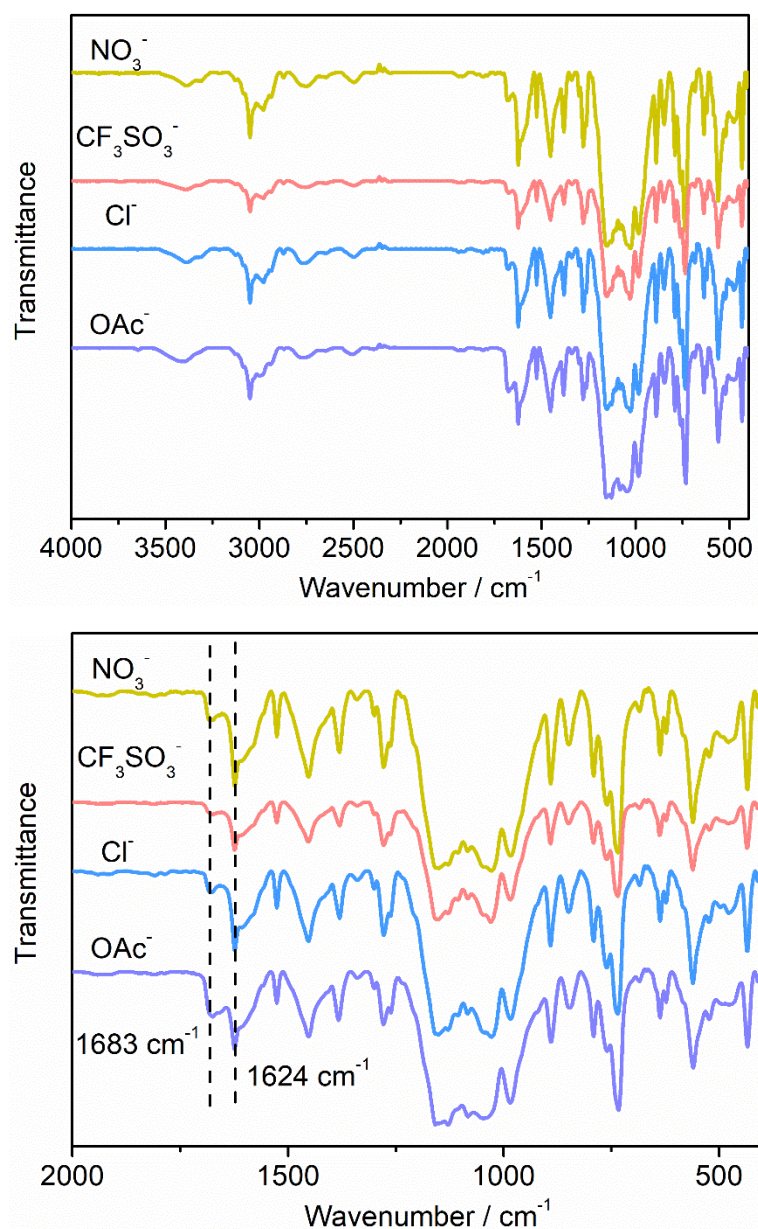

Figure S46. IR spectra of the GdX<sub>3</sub>/*R*-AnempH<sub>2</sub> (1:3) assemblies obtained in 90 vol % NPA / DMF (total volume 5 mL) and 0.5 mL water at 100 °C using different gadolinium salt [Gd(NO<sub>3</sub>)<sub>3</sub>, GdCl<sub>3</sub>, Gd(OAc)<sub>3</sub> and Gd(CF<sub>3</sub>SO<sub>3</sub>)<sub>3</sub>], up 4000-400 cm<sup>-1</sup>, bottom: 2000-400 cm<sup>-1</sup>.

## V. The influence of morphology on optical properties

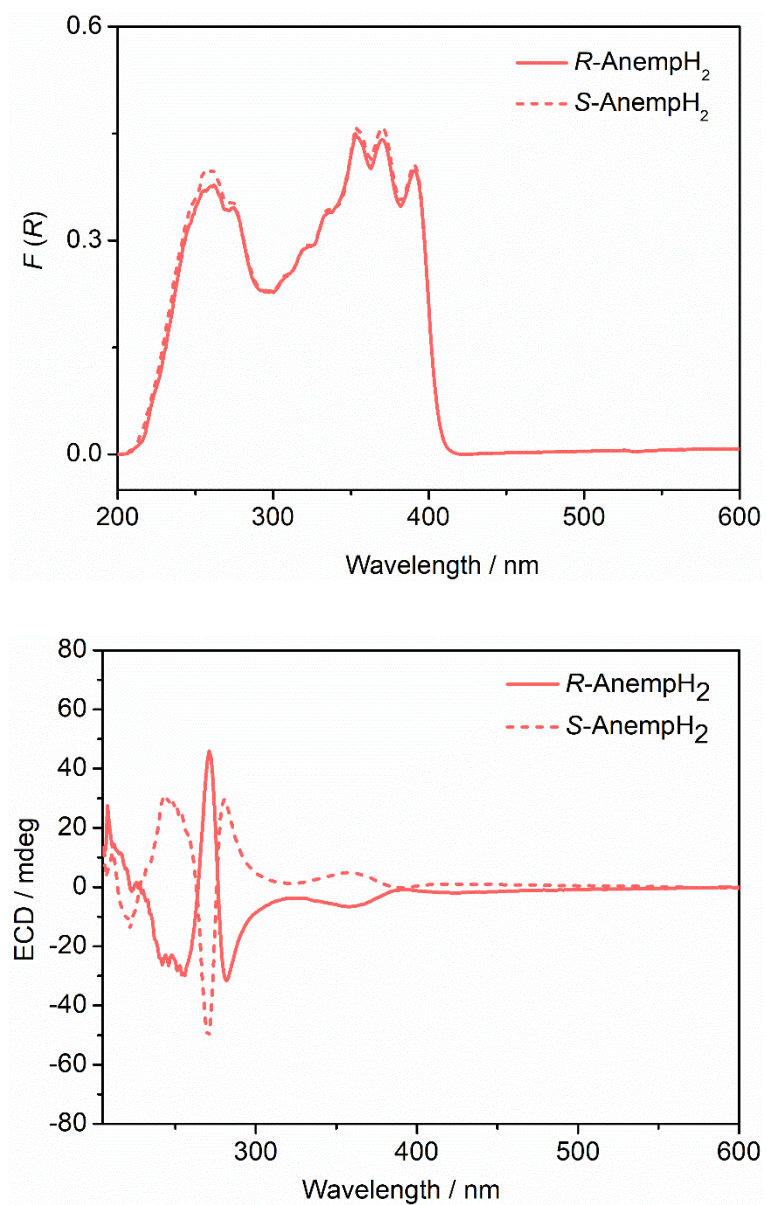

Figure S47. (top) UV-Vis spectra and (bottom) ECD spectra of  $R$ -,  $S$ -AnempH<sub>2</sub>. The ECD measurements were performed on a JASCO J-810 spectrophotometer.

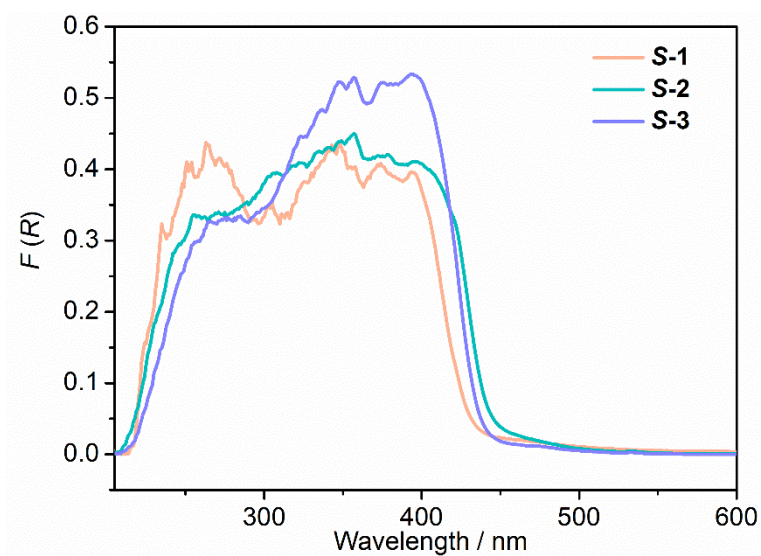

Figure S48. UV-Vis spectra of **S-1**, **S-2**, and **S-3**.

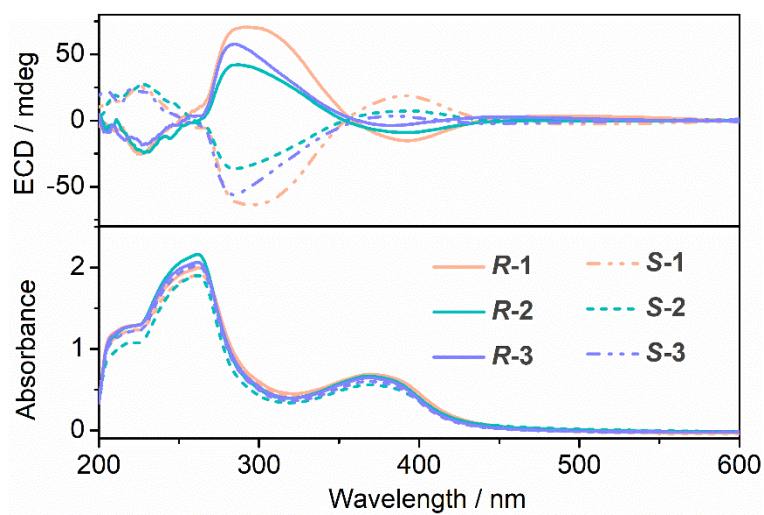

Figure S49. ECD spectra of **R-1**, **S-1**, **R-2**, **S-2**, **R-3**, **S-3**. The measurements were performed on a JASCO J-810 spectrophotometer.

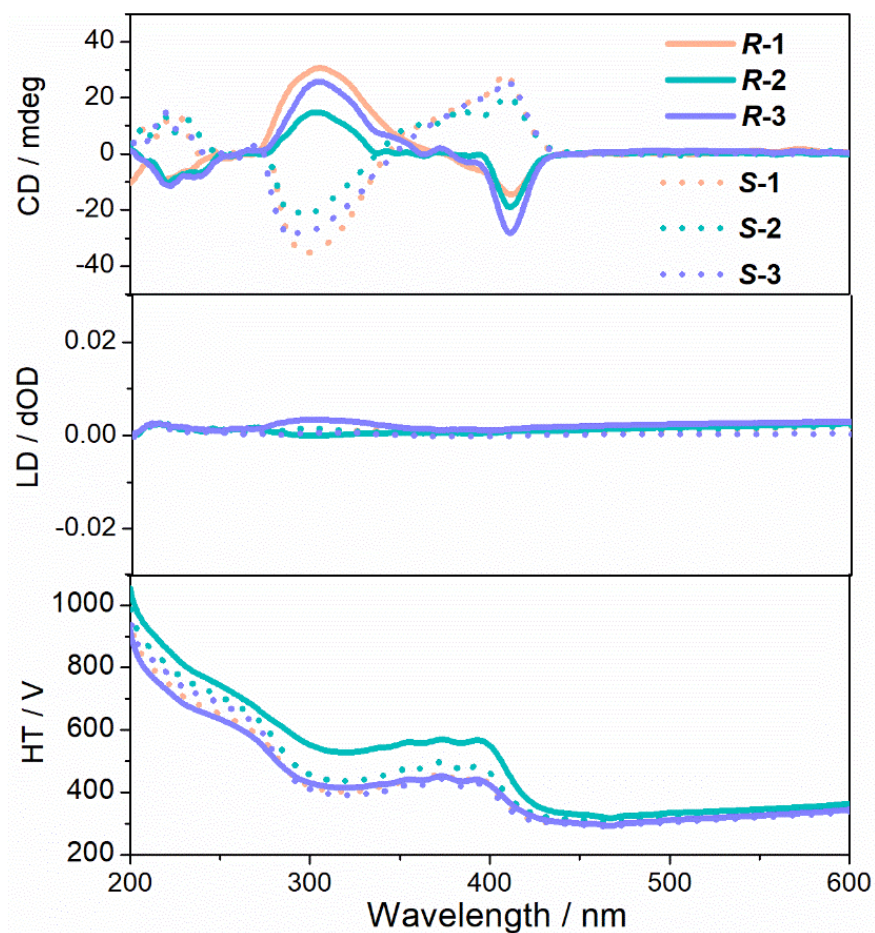

Figure S50. ECD spectra of **R-1**, **S-1**, **R-2**, **S-2**, **R-3**, **S-3**. The measurements were performed on a JASCO J-1700 CD spectrometer.

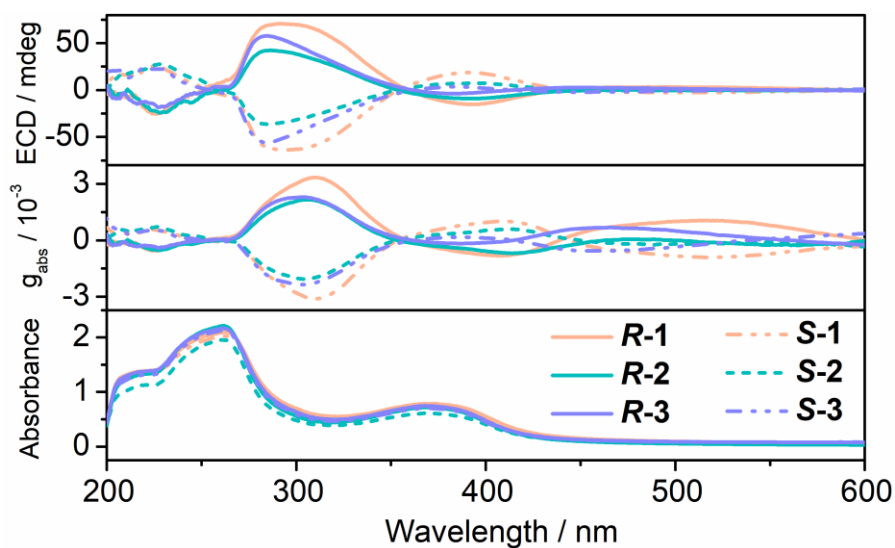

Figure S51. The ECD,  $g_{\text{abs}}$ , and absorption spectra of the R- and S-isomers of **1**, **2**, and **3**. The ECD measurements were performed on a JASCO J-810W spectrophotometer.

Table S7. The maximum emission peak, life time and quantum yield of **R-1**, **S-1**, **R-2**, **S-2**, **R-3**, **S-3**.

| $g_{\text{abs}}$ | <b>R-1</b>            | <b>S-1</b>             | <b>R-2</b>            | <b>S-2</b>             | <b>R-3</b>            | <b>S-3</b>             |
|------------------|-----------------------|------------------------|-----------------------|------------------------|-----------------------|------------------------|
| 225nm            | $-4.6 \times 10^{-4}$ | $5.1 \times 10^{-4}$   | $-4.5 \times 10^{-4}$ | $5.2 \times 10^{-4}$   | $-4.5 \times 10^{-4}$ | $5.0 \times 10^{-4}$   |
| 310nm            | $3.38 \times 10^{-3}$ | $-3.20 \times 10^{-3}$ | $2.18 \times 10^{-3}$ | $-2.05 \times 10^{-3}$ | $2.35 \times 10^{-3}$ | $-2.34 \times 10^{-3}$ |
| 425 nm           | $-9.6 \times 10^{-4}$ | $1.0 \times 10^{-4}$   | $-6.8 \times 10^{-4}$ | $6.3 \times 10^{-4}$   | $-1.8 \times 10^{-4}$ | $1.2 \times 10^{-4}$   |



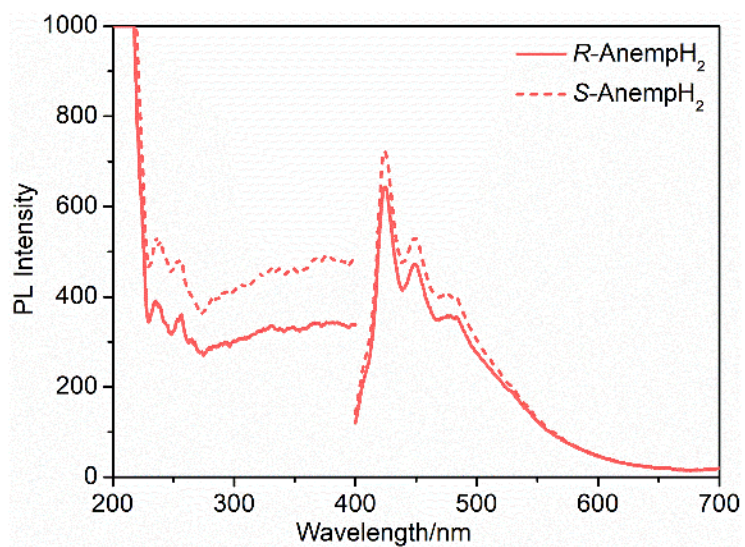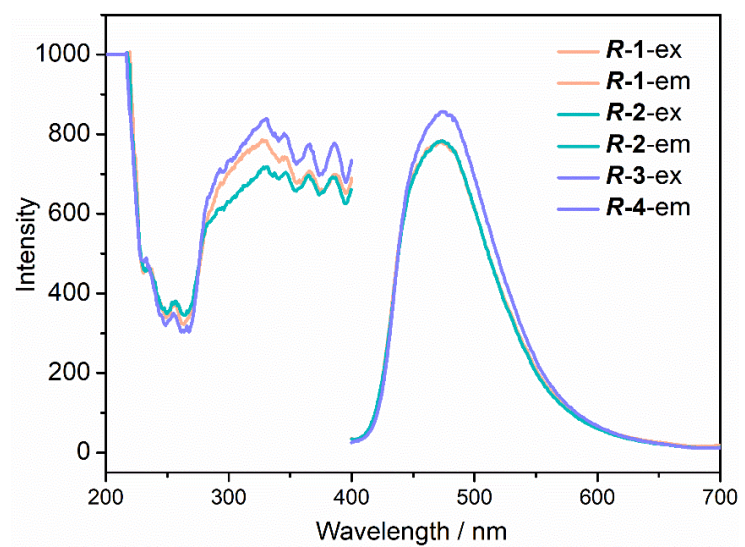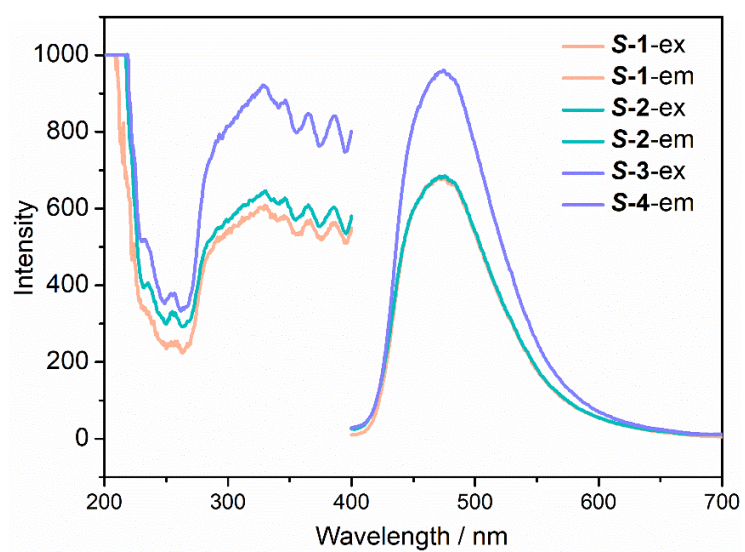

Figure S52. PL spectra of  $R$ - and  $S$ -isomers of ligand, **1**, **2** and **3**.

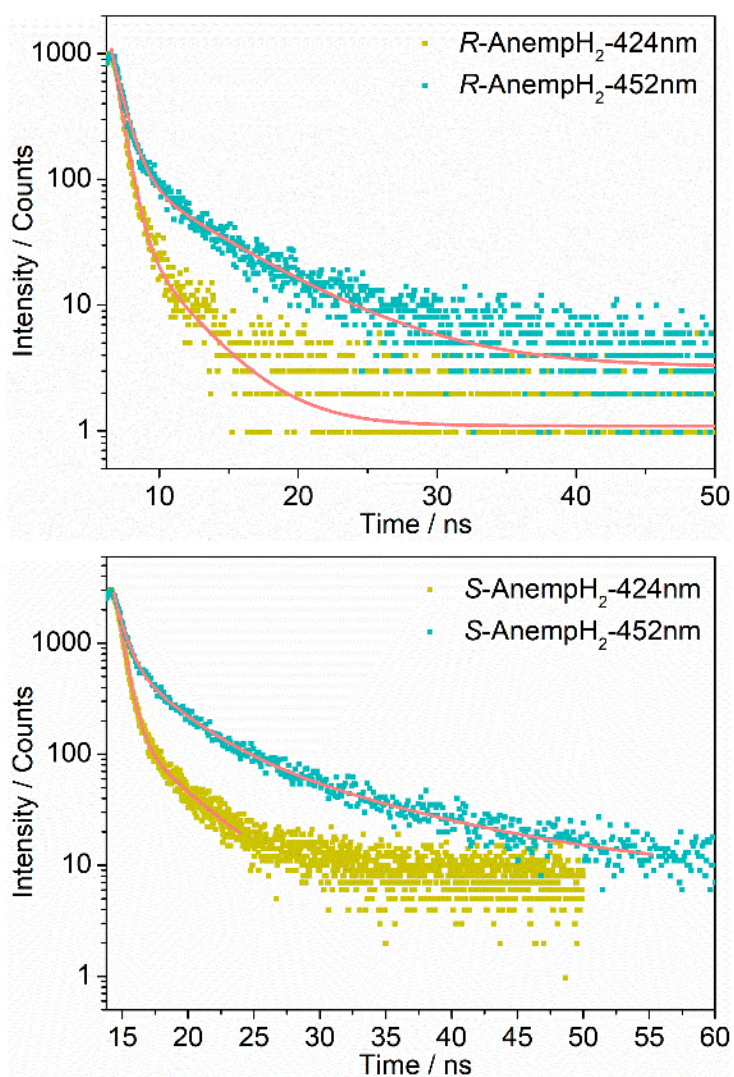

Figure S53. Fluorescence decay curves and fitting lines for *R*-AnempH<sub>2</sub> and *S*-AnempH<sub>2</sub>.

Table S8. The maximum emission peak, life time and quantum yield of *R*-AnempH<sub>2</sub> and *S*-AnempH<sub>2</sub>.

|                  | <i>R</i> -AnempH <sub>2</sub> -424nm | <i>R</i> -AnempH <sub>2</sub> -452nm | <i>S</i> -AnempH <sub>2</sub> -424nm | <i>S</i> -AnempH <sub>2</sub> -452nm          |
|------------------|--------------------------------------|--------------------------------------|--------------------------------------|-----------------------------------------------|
| $\lambda_{em}$   | 424 nm                               | 452 nm                               | 424 nm                               | 452 nm                                        |
| $\tau$ / ns      | 0.61(82.56%)<br>3.24(17.44%)         | 0.83(54.05%)<br>6.21(45.95%)         | 0.57(68.93%)<br>3.92(31.07%)         | 0.72(29.84%)<br>3.38(37.84%)<br>34.11(32.33%) |
| $\tau_{av}$ / ns | 1.07                                 | 3.29                                 | 1.61                                 | 2.20                                          |
| QY / %           |                                      | 1.28                                 |                                      | 1.11                                          |

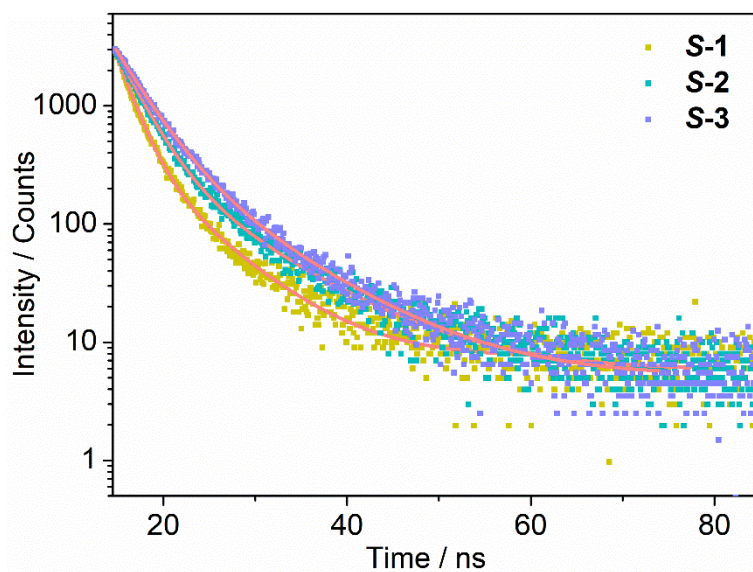

Figure S54. Fluorescence decay curves and fitting lines for **S-1**, **S-2**, and **S-3**, emitting at 484 nm.

Table S9. The maximum emission peak, life time and quantum yield of **R-1**, **S-1**, **R-2**, **S-2**, **R-3**, **S-3**.

|                  | <b>R-1</b>   | <b>R-2</b>   | <b>R-3</b>    | <b>S-1</b>   | <b>S-2</b>   | <b>S-3</b>   |
|------------------|--------------|--------------|---------------|--------------|--------------|--------------|
| $\lambda_{em}$   | 484 nm       | 484 nm       | 484 nm        | 484 nm       | 484 nm       | 484 nm       |
| $\tau$ / ns      | 1.81(67.73%) | 3.00(69.53%) | 3.77(74.02%)  | 1.81(66.53%) | 2.63(69.27%) | 3.14(67.16%) |
|                  | 6.35(32.27%) | 9.77(30.47%) | 10.32(25.98%) | 6.40(33.47%) | 8.97(30.73%) | 8.80(32.84%) |
| $\tau_{av}$ / ns | 3.28         | 5.06         | 5.47          | 3.35         | 4.58         | 4.61         |
| QY / %           | 0.88         | 1.30         | 2.41          | 1.12         | 1.23         | 1.96         |
